# Supplementary material
Source: ML conference proceedings conference paper supplement (https://openreview.net/forum?id=lxqTU8Ofb2)
Supplement: supplementary_material [file attachment]

## Supplementary Materials for “Bias–variance Tradeoff in Tensor Estimation”

Without loss of generality, if  $W \sim \text{subGaussian}(0, \kappa^2)$ , we assume throughout, unless otherwise specified in the appendix, that  $\mathbb{E}[W^2] = \kappa^2$ .

### A ADDITIONAL NUMERICAL RESULTS

**Spectral gap assumption.** Theorem 1 requires a mode-wise spectral gap condition on the singular values of  $\mathcal{M}_k(X^*)$  as in (3). We empirically examine this assumption on the same 3D brain MRI dataset as in Section 4.1. Specifically, we randomly draw 50 T1-weighted brain volumes from the IXI dataset (IXI, 2002). For each volume and each mode  $k \in \{1, 2, 3\}$ , we compute the singular values of  $\mathcal{M}_k(X^*)$  and record the gaps

$$\sigma_{r_k}(\mathcal{M}_k(X^*)) - \sigma_{r_k+1}(\mathcal{M}_k(X^*)), \quad r_k = 1, \dots, 145.$$

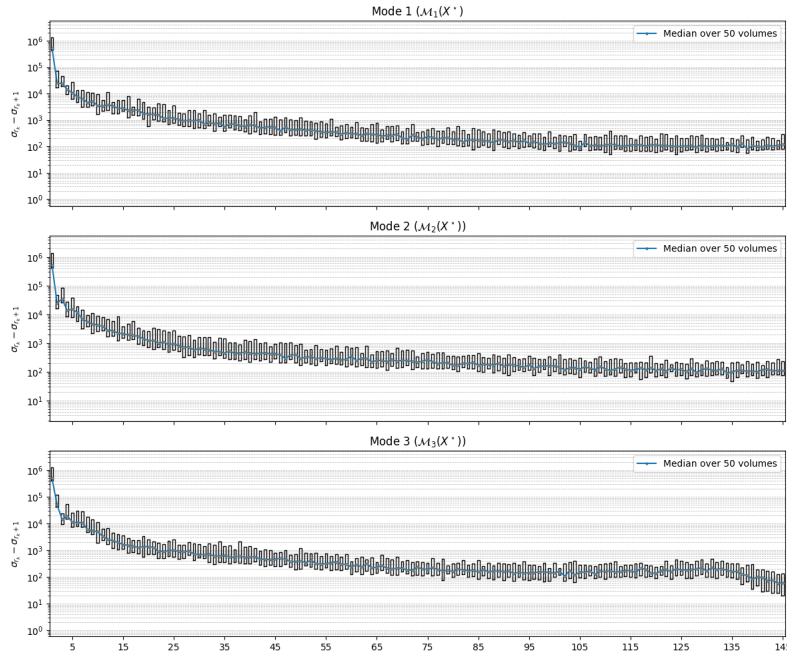

Figure 2: Empirical median and interquartile range (Q1–Q3) of the mode-wise singular-value gaps (log scale) over 50 T1-weighted IXI brain MRI volumes.

Figure 2 summarizes the distribution of these gaps across subjects. The empirical medians remain strictly positive over all ranks and modes, and the inter-quartile bands indicate that this behavior is stable across the 50 volumes. This provides concrete evidence that the spectral gap condition in (3) is not merely a idealized technical assumption of the analysis, but is indeed observed in practice.

**Bias–variance curve.** To empirically quantify the contributions of bias and variance to the error  $\|Y - X^*\|_F$ , we consider the synthetic tensor model of Section 4.2 with  $p = 100$ . For each candidate Tucker rank  $r \in \{12, 15, 18, \dots, 84, 87\}$ , we run 50 independent repetitions. The bias component is obtained as the error  $\|\tilde{X} - X^*\|_F$ , where  $\tilde{X}$  denotes the output of Algorithm 1 when applied directly to the noiseless tensor  $X^*$ . The variance component is obtained as

$$\max \left\{ \sqrt{r} \|\mathcal{M}_1(X^*) \cdot \{U_2^{(1)} \otimes U_3^{(1)}\}\|, \sqrt{r} \|\mathcal{M}_2(X^*) \cdot \{U_1^{(1)} \otimes U_3^{(1)}\}\|, \sqrt{r} \|\mathcal{M}_3(X^*) \cdot \{U_1^{(1)} \otimes U_2^{(1)}\}\|, \|X^* \times_1 U_1^{(1)} \times_2 U_2^{(1)} \times_3 U_3^{(1)}\|_F \right\}.$$

The Figure 3 reports the resulting mean bias and variance curves as functions of the target rank.

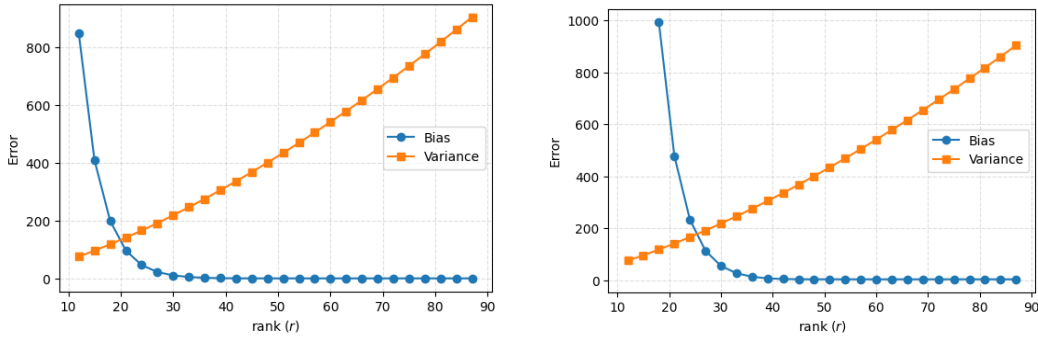

Figure 3: Mean bias and variance components of the error as functions of the target rank in the synthetic experiment with  $p = 100$ . The left panel represents the curve with scaling parameter  $\lambda = 10$  and the right panel  $\lambda = 50$ .

Figure 3 exhibits the expected bias–variance trade-off: as the target rank increases, the bias term decreases while the variance term grows, leading to an intermediate rank that minimizes the overall error.

**Practical choice of target ranks.** There are several well-known ways to select the target Tucker ranks. To select the rank parameters in a data-driven way, we follow the discussion in (Ozdemir et al., 2017) and adopt an adaptive thresholding scheme. More precisely, we choose  $r_k$  so that  $\sigma_{r_k}^2(\mathcal{M}_k(Y)) \geq \tau$ , where  $\tau$  is a threshold. A simple choice is  $\tau = \alpha \|Y\|_F^2$  with  $\alpha = 0.01$ ; we retain all singular values of  $\mathcal{M}_k(Y)$  up to the largest index  $j$  satisfying  $\sigma_j^2(\mathcal{M}_k(Y)) \geq \tau$  and discard the rest.

## B LOWER BOUNDS

In this section we prove the complementary minimax lower bounds Theorem 7 and Theorem 2 that match the estimation rates in Theorem 3 and Theorem 1. These results show that our upper bounds are sharp (up to universal constants), and therefore establish the minimax optimality of our estimation procedure.

### B.1 TENSOR LOWER BOUND

*Proof of Theorem 2.*

**Step 1.** We follow a similar strategy as in the proof of Theorem 7 to show

$$\inf_{\widehat{X}} \sup_{X^* \in \mathcal{T}_{(r_1, r_2, r_3)}^\xi} \mathbb{E} \|\widehat{X} - X^*\|_F^2 \geq c(\kappa^2 r_1 r_2 r_3 + \xi^2). \quad (9)$$

Let

$$r'_1 = \lfloor \xi^2 / (r_2 r_3 \kappa^2) \rfloor.$$

Consider the set of tensors

$$\mathcal{B} = \{B \in \mathbb{R}^{p_1 \times p_2 \times p_3} : \|B\|_\infty \leq \kappa^2, B_{i,j,k} = 0 \text{ if } i > r_1 + r'_1 \text{ or } j > r_2 \text{ or } k > r_3\}.$$

In this step, we show that

$$\mathcal{B} \subset \mathcal{T}_{(r_1, r_2, r_3)}^\xi. \quad (10)$$

To see this, let  $B \in \mathcal{B}$ , and denote  $B'$  to be the matrix such that

$$B'_{i,j,k} = \begin{cases} B_{i,j,k} & \text{if } i \leq r_1 \text{ and } j \leq r_2 \text{ and } k \leq r_3; \\ 0 & \text{otherwise.} \end{cases}$$

Then  $B' \in \mathcal{T}_{(r_1, r_2, r_3)}$  and

$$\|B - B'\|_F^2 \leq r'_1 r_2 r_3 \|B\|_\infty^2 = r'_1 r_2 r_3 \kappa^4 \leq \xi^2.$$

Therefore  $\mathcal{B} \subset \mathcal{T}_{(r_1, r_2, r_3)}^\xi$ . So

$$\inf_{\hat{X}} \sup_{X^* \in \mathcal{T}_{(r_1, r_2, r_3)}^\xi} \mathbb{E} \|\hat{X} - X^*\|_F^2 \geq \inf_{\hat{X}} \sup_{X^* \in \mathcal{B}} \mathbb{E} \|\hat{X} - X^*\|_F^2. \quad (11)$$

**Step 1.1.** Note that the tensors in  $\mathcal{B}$  are having at most  $(r_1 + r'_1)r_2r_3$  nonzero entries, the set of matrices  $\mathcal{B}$  can be viewed as vectors in  $\mathbb{R}^d$ , with  $d = (r_1 + r'_1)r_2r_3$ . Denote

$$\mathcal{V} = \{V \in \mathbb{R}^d, \|V\|_\infty \leq \kappa\}.$$

Then

$$\inf_{\hat{X}} \sup_{X^* \in \mathcal{B}} \mathbb{E} \|\hat{X} - X^*\|_F^2 = \inf_{\hat{V}} \sup_{V \in \mathcal{V}} \mathbb{E} \|\hat{V} - V\|^2.$$

Since by Lemma 8,  $\inf_{\hat{V}} \sup_{V \in \mathcal{V}} \mathbb{E} \|\hat{V} - V\|^2 \geq c_2 \kappa^2 d$ , it follows that

$$\inf_{\hat{X}} \sup_{X^* \in \mathcal{B}} \mathbb{E} \|\hat{X} - X^*\|_F^2 = \inf_{\hat{V}} \sup_{V \in \mathcal{V}} \mathbb{E} \|\hat{V} - V\|^2 \geq c_2 \kappa^2 d = c_2 \kappa^2 (r_1 + r'_1) r_2 r_3.$$

**Step 1.2.** To show (9), there are two cases. **(a)** Suppose  $\xi^2 \geq r_2 r_3 \kappa^2$ , then  $r'_1 = \lfloor \xi^2 / (r_2 r_3 \kappa^2) \rfloor \geq 1$  and therefore

$$\inf_{\hat{X}} \sup_{X^* \in \mathcal{T}_{(r_1, r_2, r_3)}^\xi} \mathbb{E} \|\hat{X} - X^*\|_F^2 \geq c_2 \kappa^2 (r_1 + r'_1) r_2 r_3 \geq c_2 r_1 r_2 r_3 + c_3 \xi^2.$$

**(b)** Suppose  $\xi^2 < r_2 r_3 \kappa^2$ . Then  $r'_1 = 0$

$$\inf_{\hat{X}} \sup_{X^* \in \mathcal{T}_{(r_1, r_2, r_3)}^\xi} \mathbb{E} \|\hat{X} - X^*\|_F^2 \geq c_2 \kappa^2 r_1 r_2 r_3 \geq \frac{c_2}{2} (\kappa^2 r_1 r_2 r_3 + \xi^2),$$

where the first inequality follows from **Step 1.1**, the second inequality follows from  $\xi^2 < r_2 r_3 \kappa^2$ .

**Step 2.** Note that

$$\inf_{\hat{X}} \sup_{X^* \in \mathcal{T}_{(r_1, r_2, r_3)}^\xi} \mathbb{E} \|\hat{X} - X^*\|_F^2 \geq \inf_{\hat{X}} \sup_{X^* \in \mathcal{T}_{(r_1, r_2, r_3)}} \mathbb{E} \|\hat{X} - X^*\|_F^2 \geq c_3 \kappa^2 \sum_{k=1}^3 p_k r_k, \quad (12)$$

where the second inequality follows from Zhang & Xia (2018). The desired result directly follows from (9) and (12).  $\square$

## B.2 MATRIX LOWER BOUND

*Proof.* Without loss of generality, suppose that  $m \leq n$  and  $r \leq m/2$ . Therefore it suffices to show that

$$\inf_{\hat{X}} \sup_{X^* \in \mathcal{M}_r^\xi} \mathbb{E} \|\hat{X} - X^*\|_F^2 \geq c_1 \left\{ \kappa^2 n r + \xi^2 \right\}. \quad (13)$$

Let  $r' = \lfloor \xi^2 / (n \kappa^2) \rfloor$ . Note that since  $\xi^2 \leq (m - r) n \kappa^2$ , it follows that

$$r' + r \leq m.$$

**Step 1.** Consider the set of matrices

$$\mathcal{B} = \{B \in \mathbb{R}^{m \times n} : \|B\|_\infty \leq \kappa^2, B_{i,j} = 0 \text{ if } i > r + r'\}.$$

In this step, we show that

$$\mathcal{B} \subset \mathcal{M}_r^\xi. \quad (14)$$

To see this, let  $B \in \mathcal{B}$ , and denote  $B'$  to be the matrix such that the first  $r$  rows of  $B'$  equals the first  $r$  rows of  $B$ , and the rest of  $(m - r)$  rows of  $B'$  are all 0. Then since  $B'$  has at most  $r$  rows that are nonzero,  $\text{rank}(B') \leq r$  and

$$\|B - B'\|_F^2 \leq r' n \|B\|_\infty^2 = r' n \kappa^2 \leq \xi^2.$$

Therefore  $\mathcal{B} \subset \mathcal{M}_r^\xi$ . So

$$\inf_{\widehat{X}} \sup_{X^* \in \mathcal{M}_r^\xi} \mathbb{E} \|\widehat{X} - X^*\|_F^2 \geq \inf_{\widehat{X}} \sup_{X^* \in \mathcal{B}} \mathbb{E} \|\widehat{X} - X^*\|_F^2. \quad (15)$$

**Step 2.** Note that matrices in  $\mathcal{B}$  are having at most  $(r + r')n$  nonzero entries, the set of matrices  $\mathcal{B}$  can be viewed as vectors in  $\mathbb{R}^d$ , with  $d = (r + r')n$ . Denote

$$\mathcal{V} = \{V \in \mathbb{R}^d, \|V\|_\infty \leq \kappa\}.$$

Then

$$\inf_{\widehat{X}} \sup_{X^* \in \mathcal{B}} \mathbb{E} \|\widehat{X} - X^*\|_F^2 = \inf_{\widehat{V}} \sup_{V \in \mathcal{V}} \mathbb{E} \|\widehat{V} - V\|^2.$$

Since by Lemma 8,  $\inf_{\widehat{V}} \sup_{V \in \mathcal{V}} \mathbb{E} \|\widehat{V} - V\|^2 \geq c_2 \kappa^2 d$ , it follows that

$$\inf_{\widehat{X}} \sup_{X^* \in \mathcal{M}_r^\xi} \mathbb{E} \|\widehat{X} - X^*\|_F^2 \geq \inf_{\widehat{X}} \sup_{X^* \in \mathcal{B}} \mathbb{E} \|\widehat{X} - X^*\|_F^2 = \inf_{\widehat{V}} \sup_{V \in \mathcal{V}} \mathbb{E} \|\widehat{V} - V\|^2 \geq c_2 \kappa^2 d = c_2 \kappa^2 (r + r')n.$$

**Step 3.** There are two cases. (a) Suppose  $\xi^2 \geq n\kappa^2$ , then  $r' = \lfloor \xi^2 / (n\kappa^2) \rfloor \geq 1$  and therefore

$$\inf_{\widehat{X}} \sup_{X^* \in \mathcal{M}_r^\xi} \mathbb{E} \|\widehat{X} - X^*\|_F^2 \geq c_2 \kappa^2 (r + r')n \geq c_2 r n + c_3 \xi^2.$$

(b) Suppose  $\xi^2 < n\kappa^2$ . Then  $r' = 0$

$$\inf_{\widehat{X}} \sup_{X^* \in \mathcal{M}_r^\xi} \mathbb{E} \|\widehat{X} - X^*\|_F^2 \geq c_2 \kappa^2 r n \geq \frac{c_2}{2} (\kappa^2 r n + \xi^2), \quad (16)$$

where the first inequality follows from **Step 1** and **Step 2**, the second inequality follows from  $\xi^2 < n\kappa^2$ .  $\square$

### B.3 TECHNICAL RESULTS

**Lemma 8.** Let  $\kappa > 0$  and  $d \in \mathbb{Z}^+$ , and denote

$$\mathcal{V} = \{V \in \mathbb{R}^d, \|V\|_\infty \leq \kappa\}.$$

Consider the model  $Y \sim \mathcal{N}(V, \kappa^2 I_d)$  where  $V \in \mathcal{V}$ . Then there exists a universal constant  $c$  such that

$$\inf_{\widehat{V}} \sup_{V \in \mathcal{V}} \mathbb{E} \|\widehat{V} - V\|^2 \geq c \kappa^2 d,$$

where infimum is taken over all the estimators  $\widehat{V}$  based on  $Y$ .

*Proof.* This is a standard minimax lower bound for bounded normal means; see for example Berry (1990) and Donoho et al. (1990).  $\square$

## C PROOF OF THEOREM 1

Many of the proof techniques employed in this work build on ideas developed in the existing tensor literature, including Vannieuwenhoven et al. (2012); Zhang & Xia (2018); Han et al. (2022).

*Proof of Theorem 1.* For any orthogonal matrix  $U \in \mathbb{O}^{p \times r}$ , we denote  $U_\perp \in \mathbb{O}^{p \times (p-r)}$  to be the orthogonal complement of  $U$ , and

$$\mathcal{P}_U = UU^\top \quad \text{and} \quad \mathcal{P}_{U_\perp} = U_\perp U_\perp^\top = I_p - \mathcal{P}_U.$$

For  $k \in \{1, 2, 3\}$ , let  $U_k^* \in \mathbb{O}^{p_k \times r_k}$  be the matrix whose columns corresponds to the top  $r_k$  singular vectors of  $\mathcal{M}_k(X^*)$ .

Throughout this proof, we assume the following good events hold:

$$\sup_{\substack{A \in \mathbb{R}^{p_1 \times p_2 \times p_3}, \\ \|A\|_F \leq 1, A \in \mathcal{T}(r_1, r_2, r_3)}} \langle Z, A \rangle \leq C \kappa \sqrt{r_1 r_2 r_3 + p_1 r_1 + p_2 r_2 + p_3 r_3}; \quad (17)$$

$$\|\mathcal{M}_1(Z) \cdot W_2 \otimes W_3\| \leq C\kappa (\sqrt{p_1 + s_2 s_3}) \text{ for non-random } W_2 \in \mathbb{O}^{p_2 \times s_2}, W_3 \in \mathbb{O}^{p_3 \times s_3}; \quad (18)$$

$$\left\| \sin \Theta(U_k^{(0)}, U_k^*) \right\| = \|U_k^{*\top} U_k^{(0)}\| \leq \frac{1}{2\sqrt{r_{\max}}} \text{ for } k \in \{1, 2, 3\}. \quad (19)$$

Indeed in [Lemma 10](#), [Lemma 11](#) and [Corollary 17](#), we show that (17), (18), and (19) hold with probability at least  $1 - C \exp(-cp_{\min})$ .

Note that

$$\begin{aligned} \left\| \tilde{X} - X^* \right\|_{\mathbb{F}} &= \left\| Y \times_1 \mathcal{P}_{U_1^{(1)}} \times_2 \mathcal{P}_{U_2^{(1)}} \times_3 \mathcal{P}_{U_3^{(1)}} - X^* \right\|_{\mathbb{F}} \\ &\leq \left\| X^* \times_1 \mathcal{P}_{U_1^{(1)}} \times_2 \mathcal{P}_{U_2^{(1)}} \times_3 \mathcal{P}_{U_3^{(1)}} - X^* \right\|_{\mathbb{F}} + \left\| Z \times_1 \mathcal{P}_{U_1^{(1)}} \times_2 \mathcal{P}_{U_2^{(1)}} \times_3 \mathcal{P}_{U_3^{(1)}} \right\|_{\mathbb{F}} \\ &= \mathbf{I}_1 + \mathbf{I}_2. \end{aligned}$$

**Step 1.** For the term  $\mathbf{I}_2$ , observe that

$$\begin{aligned} \mathbf{I}_2 &= \left\| Z \times_1 \mathcal{P}_{U_1^{(1)}} \times_2 \mathcal{P}_{U_2^{(1)}} \times_3 \mathcal{P}_{U_3^{(1)}} \right\|_{\mathbb{F}} \\ &= \sup_{W \in \mathbb{R}^{p_1 \times p_2 \times p_3}, \|W\|_{\mathbb{F}} \leq 1} \left\langle Z \times_1 \mathcal{P}_{U_1^{(1)}} \times_2 \mathcal{P}_{U_2^{(1)}} \times_3 \mathcal{P}_{U_3^{(1)}}, W \right\rangle \\ &= \sup_{W \in \mathbb{R}^{p_1 \times p_2 \times p_3}, \|W\|_{\mathbb{F}} \leq 1} \left\langle Z, W \times_1 \mathcal{P}_{U_1^{(1)}} \times_2 \mathcal{P}_{U_2^{(1)}} \times_3 \mathcal{P}_{U_3^{(1)}} \right\rangle \\ &\leq \sup_{\substack{A \in \mathbb{R}^{p_1 \times p_2 \times p_3}, \\ \|A\|_{\mathbb{F}} \leq 1, A \in \mathcal{T}_{(r_1, r_2, r_3)}}} \langle Z, A \rangle \leq C\kappa \left( r_1 r_2 r_3 + \sum_{k=1}^3 p_k r_k \right)^{1/2}, \end{aligned}$$

where the second equality follows from the duality of the Frobenius norm, and the last inequality follows from (17).

**Step 2.** For the term  $\mathbf{I}_1$ , we have that

$$\begin{aligned} \mathbf{I}_1 &= \left\| X^* \times_1 \mathcal{P}_{U_1^{(1)}} \times_2 \mathcal{P}_{U_2^{(1)}} \times_3 \mathcal{P}_{U_3^{(1)}} - X^* \right\|_{\mathbb{F}} \\ &\leq \left\| X^* \times_1 (I_{p_1} - \mathcal{P}_{U_1^{(1)}}) \right\|_{\mathbb{F}} + \left\| X^* \times_1 \mathcal{P}_{U_1^{(1)}} \times_2 (I_{p_2} - \mathcal{P}_{U_2^{(1)}}) \right\|_{\mathbb{F}} \\ &\quad + \left\| X^* \times_1 \mathcal{P}_{U_1^{(1)}} \times_2 \mathcal{P}_{U_2^{(1)}} \times_3 (I_{p_3} - \mathcal{P}_{U_3^{(1)}}) \right\|_{\mathbb{F}} \\ &\leq \sum_{k=1}^3 \left\| X^* \times_k (I_{p_k} - \mathcal{P}_{U_k^{(1)}}) \right\|_{\mathbb{F}}, \end{aligned}$$

where the last inequality follows from the observation that

$$\left\| X^* \times_1 \mathcal{P}_{U_1^{(1)}} \times_2 (I_{p_2} - \mathcal{P}_{U_2^{(1)}}) \right\|_{\mathbb{F}} \leq \left\| X^* \times_2 (I_{p_2} - \mathcal{P}_{U_2^{(1)}}) \right\|_{\mathbb{F}} \|\mathcal{P}_{U_1^{(1)}}\| \leq \left\| X^* \times_2 (I_{p_2} - \mathcal{P}_{U_2^{(1)}}) \right\|_{\mathbb{F}}.$$

We only consider the case when  $k = 1$ , since the same arguments apply for  $k = 2, 3$ . We have that

$$\begin{aligned} &\left\| X^* \times_1 (I_{p_1} - \mathcal{P}_{U_1^{(1)}}) \right\|_{\mathbb{F}} \\ &\leq \left\| X^* \times_1 (I_{p_1} - \mathcal{P}_{U_1^{(1)}}) \times_2 \mathcal{P}_{U_2^*} \right\|_{\mathbb{F}} + \left\| X^* \times_1 (I_{p_1} - \mathcal{P}_{U_1^{(1)}}) \times_2 (I_{p_2} - \mathcal{P}_{U_2^*}) \right\|_{\mathbb{F}} \\ &\leq \left\| X^* \times_1 (I_{p_1} - \mathcal{P}_{U_1^{(1)}}) \times_2 \mathcal{P}_{U_2^*} \right\|_{\mathbb{F}} + \left\| X^* \times_2 (I_{p_2} - \mathcal{P}_{U_2^*}) \right\|_{\mathbb{F}} \\ &\leq \left\| X^* \times_1 (I_{p_1} - \mathcal{P}_{U_1^{(1)}}) \times_2 \mathcal{P}_{U_2^*} \times_3 \mathcal{P}_{U_3^*} \right\|_{\mathbb{F}} + \left\| X^* \times_1 (I_{p_1} - \mathcal{P}_{U_1^{(1)}}) \times_2 \mathcal{P}_{U_2^*} \times_3 (I_{p_3} - \mathcal{P}_{U_3^*}) \right\|_{\mathbb{F}} \\ &\quad + \left\| X^* \times_2 (I_{p_2} - \mathcal{P}_{U_2^*}) \right\|_{\mathbb{F}} \\ &\leq \left\| X^* \times_1 (I_{p_1} - \mathcal{P}_{U_1^{(1)}}) \times_2 \mathcal{P}_{U_2^*} \times_3 \mathcal{P}_{U_3^*} \right\|_{\mathbb{F}} + \left\| X^* \times_3 (I_{p_3} - \mathcal{P}_{U_3^*}) \right\|_{\mathbb{F}} + \left\| X^* \times_2 (I_{p_2} - \mathcal{P}_{U_2^*}) \right\|_{\mathbb{F}} \end{aligned}$$

$$= \left\| X^* \times_1 (I_{p_1} - \mathcal{P}_{U_1^{(1)}}) \times_2 \mathcal{P}_{U_2^*} \times_3 \mathcal{P}_{U_3^*} \right\|_{\mathbb{F}} + 2\xi_{(r_1, r_2, r_3)},$$

where the second follows from that  $\|I_{p_1} - \mathcal{P}_{U_1^{(1)}}\| \leq 1$ , and the equality follows from [Lemma 29](#).

**Step 3.** We bound  $\|X^* \times_1 (I_{p_1} - \mathcal{P}_{U_1^{(1)}}) \times_2 \mathcal{P}_{U_2^*} \times_3 \mathcal{P}_{U_3^*}\|_{\mathbb{F}}$  in this step. Consider the different but relevant quantity

$$\begin{aligned} & \left\| X^* \times_1 (I_{p_1} - \mathcal{P}_{U_1^{(1)}}) \times_2 \mathcal{P}_{U_2^{(0)}} \times_3 \mathcal{P}_{U_3^{(0)}} \right\|_{\mathbb{F}} \\ &= \left\| (I_{p_1} - \mathcal{P}_{U_1^{(1)}}) \cdot \mathcal{M}_1(X^*) \cdot (\mathcal{P}_{U_2^{(0)}} \otimes \mathcal{P}_{U_3^{(0)}}) \right\|_{\mathbb{F}} \\ &= \left\| (I_{p_1} - \mathcal{P}_{U_1^{(1)}}) \cdot \mathcal{M}_1(X^*) \cdot (U_2^{(0)} \otimes U_3^{(0)})(U_2^{(0)} \otimes U_3^{(0)})^\top \right\|_{\mathbb{F}} \\ &= \left\| (I_{p_1} - \mathcal{P}_{U_1^{(1)}}) \cdot \mathcal{M}_1(X^*) \cdot (U_2^{(0)} \otimes U_3^{(0)}) \right\|_{\mathbb{F}} \\ &\geq \left\| (I_{p_1} - \mathcal{P}_{U_1^{(1)}}) \cdot \mathcal{M}_1(X^*) \cdot \mathcal{P}_{U_2^* \otimes U_3^*} \cdot (U_2^{(0)} \otimes U_3^{(0)}) \right\|_{\mathbb{F}} \\ &\quad - \left\| (I_{p_1} - \mathcal{P}_{U_1^{(1)}}) \cdot \mathcal{M}_1(X^*) \cdot (I_{p_2 p_3} - \mathcal{P}_{U_2^* \otimes U_3^*}) \cdot (U_2^{(0)} \otimes U_3^{(0)}) \right\|_{\mathbb{F}} \\ &= \text{II}_1 - \text{II}_2, \end{aligned}$$

where the first inequality follows from that  $(U_2^{(0)} \otimes U_3^{(0)}) \in \mathbb{O}^{(p_2 p_3) \times (r_2 r_3)}$ , and [Lemma 22](#). Before analyzing the terms  $\text{II}_1$  and  $\text{II}_2$ , we firstly note that

$$\begin{aligned} & (U_2^* \otimes U_3^*)^\top \cdot (U_2^{(0)} \otimes U_3^{(0)}) = (U_2^{*\top} U_2^{(0)}) \otimes (U_3^{*\top} U_3^{(0)}), \\ & \sigma_{\min} \left( (U_2^{*\top} U_2^{(0)}) \otimes (U_3^{*\top} U_3^{(0)}) \right) = \sigma_{\min} \left( U_2^{*\top} U_2^{(0)} \right) \sigma_{\min} \left( U_3^{*\top} U_3^{(0)} \right), \quad (20) \\ & \sigma_{\min}^2 \left( U_k^{*\top} U_k^{(0)} \right) = 1 - \left\| U_{k\perp}^{*\top} U_k^{(0)} \right\|^2 = 1 - \left\| \sin \Theta(U_k^*, U_k^{(0)}) \right\|^2, \end{aligned}$$

which hold due to the properties of the Kronecker product and [Lemma 25](#).

For the term  $\text{II}_1$ , we have that

$$\begin{aligned} \text{II}_1 &= \left\| (I_{p_1} - \mathcal{P}_{U_1^{(1)}}) \cdot \mathcal{M}_1(X^*) \cdot (U_2^* \otimes U_3^*) \cdot (U_2^* \otimes U_3^*)^\top \cdot (U_2^{(0)} \otimes U_3^{(0)}) \right\|_{\mathbb{F}} \\ &\geq \left\| (I_{p_1} - \mathcal{P}_{U_1^{(1)}}) \cdot \mathcal{M}_1(X^*) \cdot (U_2^* \otimes U_3^*) \right\|_{\mathbb{F}} \sigma_{\min}(U_2^{*\top} U_2^{(0)}) \sigma_{\min}(U_3^{*\top} U_3^{(0)}) \\ &= \left\| X^* \times_1 (I_{p_1} - \mathcal{P}_{U_1^{(1)}}) \times_2 \mathcal{P}_{U_2^*} \times_3 \mathcal{P}_{U_3^*} \right\|_{\mathbb{F}} \sqrt{\left(1 - \left\| \sin \Theta(U_2^*, U_2^{(0)}) \right\|^2\right) \left(1 - \left\| \sin \Theta(U_3^*, U_3^{(0)}) \right\|^2\right)} \\ &\geq \frac{3}{4} \left\| X^* \times_1 (I_{p_1} - \mathcal{P}_{U_1^{(1)}}) \times_2 \mathcal{P}_{U_2^*} \times_3 \mathcal{P}_{U_3^*} \right\|_{\mathbb{F}} \end{aligned}$$

where the first inequality follows from [Lemma 21](#), and the second equality follows from (20), and the last inequality follows from (19).

For the term  $\text{II}_2$ , we have that

$$\begin{aligned} \text{II}_2 &= \left\| (I_{p_1} - \mathcal{P}_{U_1^{(1)}}) \cdot \mathcal{M}_1(X^*) \cdot (I_{p_2 p_3} - \mathcal{P}_{U_2^* \otimes U_3^*}) \cdot (U_2^{(0)} \otimes U_3^{(0)}) \right\|_{\mathbb{F}} \\ &= \left\| (I_{p_1} - \mathcal{P}_{U_1^{(1)}}) \cdot \mathcal{M}_1(X^*) \cdot (U_2^* \otimes U_3^*)_{\perp} \cdot (U_2^* \otimes U_3^*)_{\perp}^\top \cdot (U_2^{(0)} \otimes U_3^{(0)}) \right\|_{\mathbb{F}} \\ &\leq \left\| I_{p_1} - \mathcal{P}_{U_1^{(1)}} \right\| \left\| \mathcal{M}_1(X^*) \cdot (U_2^* \otimes U_3^*)_{\perp} \right\|_{\mathbb{F}} \left\| (U_2^* \otimes U_3^*)_{\perp}^\top \cdot (U_2^{(0)} \otimes U_3^{(0)}) \right\|_{\mathbb{F}} \\ &= \left\| \mathcal{M}_1(X^*) \cdot (U_2^* \otimes U_3^*)_{\perp} \right\|_{\mathbb{F}}. \end{aligned}$$

Note that

$$\begin{aligned} & \left\| \mathcal{M}_1(X^*) \cdot (U_2^* \otimes U_3^*)_{\perp} \right\|_{\mathbb{F}} \\ &= \left\| \mathcal{M}_1(X^*) \cdot [U_{2\perp}^* \otimes U_3^* \quad U_2^* \otimes U_{3\perp}^* \quad U_{2\perp}^* \otimes U_{3\perp}^*] \right\|_{\mathbb{F}} \\ &= \sqrt{\left\| \mathcal{M}_1(X^*) \cdot (U_{2\perp}^* \otimes U_3^*) \right\|_{\mathbb{F}}^2 + \left\| \mathcal{M}_1(X^*) \cdot (U_2^* \otimes U_{3\perp}^*) \right\|_{\mathbb{F}}^2 + \left\| \mathcal{M}_1(X^*) \cdot (U_{2\perp}^* \otimes U_{3\perp}^*) \right\|_{\mathbb{F}}^2} \end{aligned}$$

$$\begin{aligned}
&\leq \|\mathcal{M}_1(X^*) \cdot (U_{2\perp}^* \otimes U_3^*)\|_F + \|\mathcal{M}_1(X^*) \cdot (U_2^* \otimes U_{3\perp}^*)\|_F + \|\mathcal{M}_1(X^*) \cdot (U_{2\perp}^* \otimes U_{3\perp}^*)\|_F \\
&= \|X^* \times_2 U_{2\perp}^* \times_3 U_3^*\|_F + \|X^* \times_2 U_2^* \times_3 U_{3\perp}^*\|_F + \|X^* \times_2 U_{2\perp}^* \times_3 U_{3\perp}^*\|_F \\
&\leq \|X^* \times_2 U_{2\perp}^*\|_F + \|X^* \times_3 U_{3\perp}^*\|_F + \|X^* \times_2 U_2^*\|_F \\
&\leq 3\xi_{(r_1, r_2, r_3)}
\end{aligned}$$

where the last inequality follows from [Lemma 29](#). Therefore,

$$\text{II}_2 \leq 3\xi_{(r_1, r_2, r_3)}.$$

Combining  $\text{II}_1$  and  $\text{II}_2$ , we have

$$\left\| X^* \times_1 (I_{p_1} - \mathcal{P}_{U_1^{(1)}}) \times_2 \mathcal{P}_{U_2^*} \times_3 \mathcal{P}_{U_3^*} \right\|_F \leq \frac{4}{3} \left\| X^* \times_1 (I_{p_1} - \mathcal{P}_{U_1^{(1)}}) \times_2 \mathcal{P}_{U_2^{(0)}} \times_3 \mathcal{P}_{U_3^{(0)}} \right\|_F + 4\xi_{(r_1, r_2, r_3)}.$$

**Step 4.** We bound  $\left\| X^* \times_1 (I_{p_1} - \mathcal{P}_{U_1^{(1)}}) \times_2 \mathcal{P}_{U_2^{(0)}} \times_3 \mathcal{P}_{U_3^{(0)}} \right\|_F$  in this step. Note that

$$\begin{aligned}
&\left\| X^* \times_1 (I_{p_1} - \mathcal{P}_{U_1^{(1)}}) \times_2 \mathcal{P}_{U_2^{(0)}} \times_3 \mathcal{P}_{U_3^{(0)}} \right\|_F \\
&= \left\| \mathcal{P}_{U_{1\perp}^{(1)}} \cdot \mathcal{M}_1(X^*) \cdot (\mathcal{P}_{U_2^{(0)}} \otimes \mathcal{P}_{U_3^{(0)}}) \right\|_F = \left\| \mathcal{P}_{U_{1\perp}^{(1)}} \cdot \mathcal{M}_1(X^*) \cdot (U_2^{(0)} \otimes U_3^{(0)}) \right\|_F
\end{aligned}$$

It suffices to apply [Lemma 23](#) to bound

$$\left\| \mathcal{P}_{U_{1\perp}^{(1)}} \cdot \mathcal{M}_1(X^*) \cdot (U_2^{(0)} \otimes U_3^{(0)}) \right\|_F.$$

Since  $U_{1\perp}^{(1)}$  corresponds to the SVD of  $\mathcal{M}_1(Y) \cdot (U_2^{(0)} \otimes U_3^{(0)})$ , let

$$A = \mathcal{M}_1(Y) \cdot (U_2^{(0)} \otimes U_3^{(0)}) \quad \text{and} \quad B = \mathcal{M}_1(X^*) \cdot (U_2^{(0)} \otimes U_3^{(0)}).$$

It follows from [Lemma 23](#) that

$$\begin{aligned}
\left\| X^* \times_1 (I_{p_1} - \mathcal{P}_{U_1^{(1)}}) \times_2 \mathcal{P}_{U_2^{(0)}} \times_3 \mathcal{P}_{U_3^{(0)}} \right\|_F &= \left\| \mathcal{P}_{U_{1\perp}^{(1)}} \cdot \mathcal{M}_1(X^*) \cdot (U_2^{(0)} \otimes U_3^{(0)}) \right\|_F \\
&\leq C_1 \|B - B_{r_1}\|_F + C_2 \sqrt{r_1} \|A - B\|. \quad (21)
\end{aligned}$$

Here

$$\begin{aligned}
\|A - B\| &= \left\| \mathcal{M}_1(Z) \cdot U_2^{(0)} \otimes U_3^{(0)} \right\| \\
&= \left\| \mathcal{M}_1(Z) \cdot (U_2^* U_2^{*\top} + U_{2\perp}^* U_{2\perp}^{*\top}) U_2^{(0)} \otimes U_3^{(0)} \right\| \\
&\leq \left\| \mathcal{M}_1(Z) \cdot (U_2^* U_2^{*\top} U_2^{(0)}) \otimes U_3^{(0)} \right\| + \left\| \mathcal{M}_1(Z) \cdot (U_{2\perp}^* U_{2\perp}^{*\top} U_2^{(0)}) \otimes U_3^{(0)} \right\| \\
&\leq \left\| \mathcal{M}_1(Z) \cdot U_2^* \otimes U_3^{(0)} \right\| \|U_2^{*\top} U_2^{(0)}\| + \left\| \mathcal{M}_1(Z) \cdot U_{2\perp}^* \otimes U_3^{(0)} \right\| \|U_{2\perp}^{*\top} U_2^{(0)}\|. \quad (22)
\end{aligned}$$

Note that

$$\begin{aligned}
&\left\| \mathcal{M}_1(Z) \cdot U_2^* \otimes U_3^{(0)} \right\| \|U_2^{*\top} U_2^{(0)}\| = \left\| \mathcal{M}_1(Z) \cdot U_2^* \otimes (U_3^* U_3^{*\top} + U_{3\perp}^* U_{3\perp}^{*\top}) U_3^{(0)} \right\| \\
&\leq \left\| \mathcal{M}_1(Z) \cdot U_2^* \otimes (U_3^* U_3^{*\top} U_3^{(0)}) \right\| + \left\| \mathcal{M}_1(Z) \cdot U_2^* \otimes (U_{3\perp}^* U_{3\perp}^{*\top}) U_3^{(0)} \right\| \\
&\leq \left\| \mathcal{M}_1(Z) \cdot U_2^* \otimes U_3^* \right\| \|U_3^{*\top} U_3^{(0)}\| + \left\| \mathcal{M}_1(Z) \cdot U_2^* \otimes U_{3\perp}^* \right\| \|U_{3\perp}^{*\top} U_3^{(0)}\| \\
&\leq C_4 \kappa(\sqrt{p_1 + r_2 r_3}) + C_5 \kappa(\sqrt{p_1 + p_3 r_2}) r_{\max}^{-1/2}, \quad (23)
\end{aligned}$$

where the last inequality follows from (18) and the fact that  $\|U_2^{*\top} U_2^{(0)}\| \leq 1$ . In addition

$$\begin{aligned}
&\left\| \mathcal{M}_1(Z) \cdot U_{2\perp}^* \otimes U_3^{(0)} \right\| \|U_{2\perp}^{*\top} U_2^{(0)}\| \leq \left\| \mathcal{M}_1(Z) \cdot U_{2\perp}^* \otimes (U_3^* U_3^{*\top} + U_{3\perp}^* U_{3\perp}^{*\top}) U_3^{(0)} \right\| \|U_{2\perp}^{*\top} U_2^{(0)}\| \\
&\leq \left\| \mathcal{M}_1(Z) \cdot U_{2\perp}^* \otimes (U_3^* U_3^{*\top} U_3^{(0)}) \right\| \|U_{2\perp}^{*\top} U_2^{(0)}\| + \left\| \mathcal{M}_1(Z) \cdot U_{2\perp}^* \otimes (U_{3\perp}^* U_{3\perp}^{*\top} U_3^{(0)}) \right\| \|U_{2\perp}^{*\top} U_2^{(0)}\| \\
&\leq \left\| \mathcal{M}_1(Z) \cdot U_{2\perp}^* \otimes U_3^* \right\| \|U_3^{*\top} U_3^{(0)}\| \|U_{2\perp}^{*\top} U_2^{(0)}\| + \left\| \mathcal{M}_1(Z) \cdot U_{2\perp}^* \otimes U_{3\perp}^* \right\| \|U_{3\perp}^{*\top} U_3^{(0)}\| \|U_{2\perp}^{*\top} U_2^{(0)}\| \\
&\leq C \kappa(\sqrt{p_1 + p_2 r_3}) r_{\max}^{-1/2} + C \kappa(\sqrt{p_1 + p_3 r_2}) r_{\max}^{-1}. \quad (24)
\end{aligned}$$

Therefore (22), (23) and (24) leads to

$$\|A - B\| \leq C_4 \kappa (\sqrt{p_1} + \sqrt{r_2 r_3} + \sqrt{p_2 r_3} r_{\max}^{-1/2} + \sqrt{p_3 r_2} r_{\max}^{-1/2}). \quad (25)$$

In addition,

$$\begin{aligned} \|B - B_{r_1}\|_F &= \|\mathcal{M}_1(X^*) \cdot U_2^{(0)} \otimes U_3^{(0)} - \{\mathcal{M}_1(X^*) \cdot U_2^{(0)} \otimes U_3^{(0)}\}_{r_1}\|_F \\ &\leq \|\mathcal{M}_1(X^*) \cdot U_2^{(0)} \otimes U_3^{(0)} - \{\mathcal{M}_1(X^*)\}_{r_1} \cdot U_2^{(0)} \otimes U_3^{(0)}\|_F \\ &\leq \|(\mathcal{M}_1(X^*) - \{\mathcal{M}_1(X^*)\}_{r_1}) U_2^{(0)} \otimes U_3^{(0)}\|_F \\ &\leq \|\mathcal{M}_1(X^*) - \{\mathcal{M}_1(X^*)\}_{r_1}\|_F = \sqrt{\sum_{j=r_1+1}^{\text{rank}(\mathcal{M}_1(X^*))} \sigma_j^2(\mathcal{M}_1(X^*))} \leq \xi_{(r_1, r_2, r_3)}. \end{aligned} \quad (26)$$

Here  $\{\mathcal{M}_1(X^*) \cdot U_2^{(0)} \otimes U_3^{(0)}\}_{r_1}$  indicate the best rank  $r_1$  estimate of the matrix  $\mathcal{M}_1(X^*) \cdot U_2^{(0)} \otimes U_3^{(0)}$  in the first equality, and so for any rank  $r_1$  matrix  $\Phi$ ,

$$\|\mathcal{M}_1(X^*) \cdot U_2^{(0)} \otimes U_3^{(0)} - \{\mathcal{M}_1(X^*) \cdot U_2^{(0)} \otimes U_3^{(0)}\}_{r_1}\|_F \leq \|\mathcal{M}_1(X^*) \cdot U_2^{(0)} \otimes U_3^{(0)} - \Phi\|_F;$$

the second inequality holds because  $\{\mathcal{M}_1(X^*)\}_{r_1} \cdot U_2^{(0)} \otimes U_3^{(0)}$  is at most rank  $r_1$ , and the last inequality follows from [Lemma 29](#).

It follows from (21), (25) and (26) that

$$\|X^* \times_1 (I_{p_1} - \mathcal{P}_{U_1^{(1)}}) \times_2 \mathcal{P}_{U_2^{(0)}} \times_3 \mathcal{P}_{U_3^{(0)}}\|_F \leq C_5 \kappa (\sqrt{p_1 r_1} + \sqrt{r_1 r_2 r_3} + \sqrt{p_2 r_2} + \sqrt{p_3 r_3}) + C_5 \xi_{(r_1, r_2, r_3)}.$$

**Step 5.** The conclusions of [Step 3](#) and [Step 4](#) lead to

$$\|X^* \times_1 (I_{p_1} - \mathcal{P}_{U_1^{(1)}}) \times_2 \mathcal{P}_{U_2^*} \times_3 \mathcal{P}_{U_3^*}\|_F \leq C_6 \kappa (\sqrt{p_1 r_1} + \sqrt{r_1 r_2 r_3} + \sqrt{p_2 r_2} + \sqrt{p_3 r_3}) + C_6 \xi_{(r_1, r_2, r_3)}.$$

This bound together with [Step 1](#) and [Step 2](#) leads to

$$\|\tilde{X} - X^*\|_F \leq C_7 \kappa (\sqrt{p_1 r_1} + \sqrt{p_2 r_2} + \sqrt{p_3 r_3} + \sqrt{r_1 r_2 r_3}) + C_7 \xi_{(r_1, r_2, r_3)}.$$

□

## D PROOF OF THEOREM 3

*Proof of Theorem 3.* By the triangle inequality,

$$\|Y_{(r)} - X^*\|_F \leq \|X_{(r)}^* - X^*\|_F + \|Y_{(r)} - X_{(r)}^*\|_F = \xi_{(r)} + \|Y_{(r)} - X_{(r)}^*\|_F. \quad (27)$$

Since  $\text{rank}(Y_{(r)} - X_{(r)}^*) \leq 2r$ , we have

$$\|Y_{(r)} - X_{(r)}^*\|_F^2 = \sum_{k=1}^{2r} \sigma_k^2(Y_{(r)} - X_{(r)}^*). \quad (28)$$

Write

$$Y_{(r)} - X_{(r)}^* = (X^* - X_{(r)}^*) + Z + (Y_{(r)} - Y).$$

It follows from Ky Fan's Theorem ([Lemma 28](#)) that,

$$\sqrt{\sum_{i=1}^{2r} \sigma_i^2(Y_{(r)} - X_{(r)}^*)} \leq \sqrt{\sum_{i=1}^{2r} \sigma_i^2(X^* - X_{(r)}^*)} + \sqrt{\sum_{i=1}^{2r} \sigma_i^2(Z)} + \sqrt{\sum_{i=1}^{2r} \sigma_i^2(Y_{(r)} - Y)}.$$

Using the identity  $\sigma_i(X^* - X_{(r)}^*) = \sigma_{r+i}(X^*)$  and likewise for  $Y$ , we obtain

$$\|Y_{(r)} - X_{(r)}^*\|_F \leq \sqrt{\sum_{i=1}^{2r} \sigma_{r+i}^2(X^*)} + \sqrt{\sum_{i=1}^{2r} \sigma_i^2(Z)} + \sqrt{\sum_{i=1}^{2r} \sigma_{r+i}^2(Y)}. \quad (29)$$

To further simplify the third term, we apply Weyl's inequality (Theorem 27) to obtain

$$\sigma_{r+i}(Y) \leq \sigma_{r+i}(X^*) + \sigma_1(Z),$$

which gives

$$\sigma_{r+i}^2(Y) \leq 2 \{ \sigma_{r+i}^2(X^*) + \sigma_1^2(Z) \}.$$

Substituting this into (29), we get

$$\begin{aligned} \|Y_{(r)} - X_{(r)}^*\|_{\text{F}} &\leq \sqrt{\sum_{i=1}^{2r} \sigma_{r+i}^2(X^*)} + \sqrt{\sum_{i=1}^{2r} \sigma_i^2(Z)} + \sqrt{2 \sum_{i=1}^{2r} \sigma_{r+i}^2(X^*)} + 2\sqrt{r}\sigma_1(Z) \\ &\leq (1 + \sqrt{2}) \sqrt{\sum_{i=1}^{2r} \sigma_{r+i}^2(X^*)} + (2 + \sqrt{2})\sqrt{r}\|Z\| \\ &= (1 + \sqrt{2}) \sqrt{\sum_{i=r+1}^{3r} \sigma_i^2(X^*)} + (2 + \sqrt{2})\sqrt{r}\|Z\|, \end{aligned}$$

where the second inequality follows from the fact that for any  $k \geq 1$ , we have  $\sigma_k(Z) \leq \sigma_1(Z) = \|Z\|$ . Substituting the bound of  $\|Y_{(r)} - X_{(r)}^*\|_{\text{F}}$  into (27), we obtain

$$\|Y_{(r)} - X^*\|_{\text{F}} \leq (2 + \sqrt{2}) \sqrt{\sum_{i=r+1}^{\min\{m,n\}} \sigma_i^2(X^*)} + (2 + \sqrt{2})\sqrt{r}\|Z\|.$$

□

## E DEVIATION BOUNDS

Throughout this appendix we work with centered sub-Gaussian random variables with parameter  $\kappa^2$ , and we assume (without loss of generality) that each such variable  $X$  satisfies  $\mathbb{E}X^2 = \kappa^2$ . Any other case can be handled with additional constants in the bounds.

**Lemma 9** (Theorem 4.4.3 in Vershynin (2018)). *Assume all the entries of  $Z \in \mathbb{R}^{m \times n}$  are independent mean-zero sub-Gaussian random variables, i.e.*

$$\|Z_{ij}\|_{\psi_2} = \sup_{q \geq 1} \mathbb{E}(|Z_{ij}|^q)^{1/q} / q^{1/2} \leq \kappa.$$

Then there exist some universal constant  $C > 0$ , such that

$$\|Z\| \leq C\kappa (\sqrt{m} + \sqrt{n})$$

with probability at least  $1 - \exp(-(m + n))$ .

**Lemma 10.** *Suppose all the entries of  $Z \in \mathbb{R}^{p_1 \times p_2 \times p_3}$  are independent mean-zero sub-Gaussian random variables, i.e.*

$$\|Z_{ijk}\|_{\psi_2} = \sup_{q \geq 1} \mathbb{E}(|Z_{ijk}|^q)^{1/q} / q^{1/2} \leq \kappa.$$

Then there exist some universal constants  $C, c > 0$ , such that

$$\sup_{\substack{A \in \mathbb{R}^{p_1 \times p_2 \times p_3}, \\ \|A\|_{\text{F}} \leq 1, A \in \mathcal{T}_{(r_1, r_2, r_3)}}} \langle Z, A \rangle \leq C\kappa \left( r_1 r_2 r_3 + \sum_{k=1}^3 p_k r_k \right)^{1/2}$$

with probability at least  $1 - \exp(-c \sum_{k=1}^3 p_k r_k)$ .

*Proof.* This directly follows from Lemma E.5 in Han et al. (2022). □

**Lemma 11.** Suppose all the entries of  $Z \in \mathbb{R}^{p_1 \times p_2 \times p_3}$  are independent mean-zero sub-Gaussian random variables, i.e.

$$\|Z_{ijk}\|_{\psi_2} = \sup_{q \geq 1} \mathbb{E}(|Z_{ijk}|^q)^{1/q} / q^{1/2} \leq \kappa.$$

Let  $W_2 \in \mathbb{O}^{p_2 \times s_2}$  and  $W_3 \in \mathbb{O}^{p_3 \times s_3}$  be non-random. Then there exists absolute positive constants  $C_1, C_2$  and  $c$  such that

$$\mathbb{P}\left(\|\mathcal{M}_1(Z)(W_2 \otimes W_3)\| \geq C_1 \kappa (\sqrt{p_1 + s_2 s_3})\right) \leq C_2 \exp(-cp_1),$$

*Proof.* It suffices to observe that  $W_2 \otimes W_3 \in \mathbb{O}^{p_2 p_3 \times r_2 r_3}$ . The desired result is a direct consequence of Lemma 13.  $\square$

**Lemma 12.** Suppose all the entries of  $Z \in \mathbb{R}^{p_1 \times p_2 \times p_3}$  are independent mean-zero sub-Gaussian random variables, i.e.

$$\|Z_{ijk}\|_{\psi_2} = \sup_{q \geq 1} \mathbb{E}(|Z_{ijk}|^q)^{1/q} / q^{1/2} \leq \kappa.$$

Then there exists absolute positive constants  $C_1, C_2$  and  $c$  such that

$$\begin{aligned} & \mathbb{P}\left(\sup_{\substack{V_2 \in \mathbb{R}^{p_2 \times r_2}, \|V_2\| \leq 1 \\ V_3 \in \mathbb{R}^{p_3 \times r_3}, \|V_3\| \leq 1}} \|\mathcal{M}_1(Z)(V_2 \otimes V_3)\| \geq C_1 \kappa \left(\sqrt{p_1 + r_2 r_3 + p_2 r_2 + p_3 r_3}\right)\right) \\ & \leq C_2 \exp(-c(p_1 + p_2 + p_3)), \end{aligned}$$

*Proof.* It follows from the assumption that  $(\mathcal{M}_1(Z))_{i,j} \stackrel{i.i.d}{\sim} \text{subGaussian}(0, \kappa^2)$ .

**Step 1.** For fixed  $V_2 \in \mathbb{R}^{p_2 \times r_2}$  with  $\|V_2\| \leq 1$  and  $V_3 \in \mathbb{R}^{p_3 \times r_3}$  with  $\|V_3\| \leq 1$ , it follows that

$$\|V_2 \otimes V_3\| = \|V_2\| \|V_3\| \leq 1,$$

We upper bound  $\|\mathcal{M}_1(Z) \cdot (V_2 \otimes V_3)\|$  for any fixed  $V_2$  and  $V_3$ . Since,

$$\mathcal{M}(Z) \in \mathbb{R}^{p_1 \times p_2 p_3}, (\mathcal{M}(Z))_{i,j} \stackrel{i.i.d}{\sim} \text{subGaussian}(0, \kappa^2), \quad \text{and} \quad \|V_2 \otimes V_3\| = \|V_2\| \|V_3\| = 1.$$

It follows from Lemma 13 that

$$\mathbb{P}\left(\|\mathcal{M}_1(Z) \cdot (V_2 \otimes V_3)\| > x\right) \leq 2 \exp(C(p_1 + r_2 r_3) - cx^2 \kappa^{-2}).$$

**Step 2.** Let  $\mathcal{N}_{p_2, r_2}(\epsilon)$  denote an  $\epsilon$  net of the set

$$\{A \in \mathbb{R}^{p_2 \times r_2} : \|A\| \leq 1\}$$

with respect to the operator norm  $\|\cdot\|$ . Similarly, let  $\mathcal{N}_{p_3, r_3}(\epsilon)$  denote an  $\epsilon$  net of the set

$$\{B \in \mathbb{R}^{p_3 \times r_3} : \|B\| \leq 1\}$$

with respect to the operator norm  $\|\cdot\|$ . Denote the random quantity

$$\psi = \sup_{\substack{V_2 \in \mathbb{R}^{p_2 \times r_2}, \|V_2\| \leq 1 \\ V_3 \in \mathbb{R}^{p_3 \times r_3}, \|V_3\| \leq 1}} \|\mathcal{M}_1(Z)(V_2 \otimes V_3)\|.$$

For any given  $V_2 \in \mathbb{R}^{p_2 \times r_2}$  and  $V_3 \in \mathbb{R}^q$  with  $\|V_2\| \leq 1$  and  $\|V_3\| \leq 1$ , let  $\tilde{V}_2 \in \mathcal{N}_{p_2, r_2}(1/4)$  and  $\tilde{V}_3 \in \mathcal{N}_{p_3, r_3}(1/4)$  be such that

$$\|V_2 - \tilde{V}_2\| \leq 1/4 \quad \text{and} \quad \|V_3 - \tilde{V}_3\| \leq 1/4.$$

Then

$$\|\mathcal{M}_1(Z)V_2 \otimes V_3\| \leq \|\mathcal{M}_1(Z)(V_2 - \tilde{V}_2) \otimes V_3\| + \|\mathcal{M}_1(Z)\tilde{V}_2 \otimes (V_3 - \tilde{V}_3)\| + \|\mathcal{M}_1(Z)\tilde{V}_2 \otimes \tilde{V}_3\|.$$

Note that  $\|V_2 - \tilde{V}_2\| \leq 1/4$ . So

$$\|\mathcal{M}_1(Z)(V_2 - \tilde{V}_2) \otimes V_3\| = \frac{1}{4} \|\mathcal{M}_1(Z)\{4(V_2 - \tilde{V}_2)\} \otimes V_3\| \leq \frac{\psi}{4}.$$

1188 Similarly

$$1189 \quad \|\mathcal{M}_1(Z)V_2 \otimes (V_3 - \tilde{V}_3)\| \leq \frac{\psi}{4}.$$

1191 In addition,

$$1192 \quad \|\mathcal{M}_1(Z)\tilde{V}_2 \otimes \tilde{V}_3\| \leq \sup_{V_2 \in \mathcal{N}_{p_2, r_2}(1/4), b \in \mathcal{N}_{p_3, r_3}(1/4)} \|\mathcal{M}_1(Z)V_2 \otimes V_3\|.$$

1195 So for any  $V_2$  and  $V_3$ ,

$$1196 \quad \|\mathcal{M}_1(Z)V_2 \otimes V_3\| \leq \frac{1}{2}\psi + \sup_{V_2 \in \mathcal{N}_{p_2, r_2}(1/4), b \in \mathcal{N}_{p_3, r_3}(1/4)} \|\mathcal{M}_1(Z)V_2 \otimes V_3\|.$$

1199 Taking sup over all  $V_2 \in \{A \in \mathbb{R}^{p_2 \times r_2} : \|A\| \leq 1\}$  and  $V_3 \in \{B \in \mathbb{R}^{p_3 \times r_3} : \|B\| \leq 1\}$ , it follows that

$$1201 \quad \psi \leq \frac{1}{2}\psi + \sup_{V_2 \in \mathcal{N}_{p_2, r_2}(1/4), b \in \mathcal{N}_{p_3, r_3}(1/4)} \|\mathcal{M}_1(Z)V_2 \otimes V_3\|,$$

1203 or simply

$$1204 \quad \psi \leq 2 \sup_{V_2 \in \mathcal{N}_{p_2, r_2}(1/4), b \in \mathcal{N}_{p_3, r_3}(1/4)} \|\mathcal{M}_1(Z)V_2 \otimes V_3\|.$$

1206 **Step 3.** By Proposition 8 in Pajor (1998), the cardinality of  $\mathcal{N}_{p_2, r_2}(\epsilon)$  is bounded  $(\frac{C}{\epsilon})^{p_2 r_2}$ , and  $\mathcal{N}_{p_3, r_3}(\epsilon)$  is bounded  $(\frac{C}{\epsilon})^{p_3 r_3}$ . Therefore

$$1209 \quad \mathbb{P}(\psi \geq 2t) \leq \mathbb{P}\left(\sup_{V_2 \in \mathcal{N}_{p_2, r_2}(1/4), b \in \mathcal{N}_{p_3, r_3}(1/4)} \|\mathcal{M}_1(Z)V_2 \otimes V_3\| \geq t\right)$$

$$1211 \quad \leq C_2^{p_2 r_2} C_3^{p_3 r_3} \sup_{V_2 \in \mathcal{N}_{p_2, r_2}(1/4), b \in \mathcal{N}_{p_3, r_3}(1/4)} \mathbb{P}\left(\|\mathcal{M}_1(Z)V_2 \otimes V_3\| \geq t\right)$$

$$1213 \quad \leq 2 \exp(C(p_1 + r_2 r_3 + p_2 r_2 + p_3 r_3) - ct^2 \kappa^{-2}).$$

1215 Here  $C$  and  $C_3$  are positive constants. The desired result follows by noting

$$1216 \quad \psi = \sup_{\substack{V_2 \in \mathbb{R}^{p_2 \times r_2}, \|V_2\| \leq 1 \\ V_3 \in \mathbb{R}^{p_3 \times r_3}, \|V_3\| \leq 1}} \|\mathcal{M}_1(Z)(V_2 \otimes V_3)\|.$$

1220 □

1221 **Lemma 13.** Suppose  $Z \in \mathbb{R}^{n \times m}$ , with  $Z_{ij} \stackrel{i.i.d.}{\sim}$  subGaussian(0,  $\kappa^2$ ). Let  $A \in \mathbb{R}^{p \times n}$  and  $B \in \mathbb{R}^{m \times q}$  be non-random matrices. Then for any  $t > 0$

$$1224 \quad \mathbb{P}(\|AZB\| > t) \leq C_1 \exp\left(C(p+q) - \frac{ct^2}{\kappa^2 \|A\|^2 \|B\|^2}\right). \quad (30)$$

1227 *Proof.*

1228 **Step 1.** Let  $u \in \mathbb{R}^n$  and  $v \in \mathbb{R}^m$  be non-random. Then that  $u^\top Z v = \sum_{i=1}^n \sum_{j=1}^m u_i Z_{ij} v_j$ . Since  $Z_{ij}$  are i.i.d. sub-Gaussian with parameter  $\kappa^2$ , it follows that  $u^\top Z v$  is sub-Gaussian with parameter  $\kappa^2 \|u\|_2 \|v\|_2$ . Consequently by Hoeffding's inequality,

$$1232 \quad \mathbb{P}(|u^\top Z v| > t) \leq 2 \exp\left(-\frac{ct^2}{\kappa^2 \|u\|_2^2 \|v\|_2^2}\right).$$

1235 **Step 2.** Let  $a \in \mathbb{R}^p$  and  $b \in \mathbb{R}^q$  be non-random vectors such that  $\|a\|_2, \|b\|_2 \leq 1$ . By **Step 1**, it follows that

$$1237 \quad \mathbb{P}(|a^\top AZB| > t) \leq 2 \exp\left(-\frac{ct^2}{\kappa^2 \|Aa\|_2^2 \|Bb\|_2^2}\right) \leq 2 \exp\left(-\frac{ct^2}{\kappa^2 \|A\|^2 \|B\|^2}\right).$$

1240 **Step 3.** Let  $\mathcal{N}_p(\epsilon)$  be an  $\epsilon$ -net of the unit ball in  $\mathbb{R}^p$ . It follows that for any  $a \in \mathbb{R}^p$  with  $\|a\|_2 = 1$ , there exists  $\tilde{a} \in \mathcal{N}_p(\epsilon)$  such that

$$1241 \quad \|a - \tilde{a}\|_2 \leq \epsilon.$$

1242 Similarly let  $\mathcal{N}_q(\epsilon)$  be an  $\epsilon$ -net of the unit ball in  $\mathbb{R}^q$ .

1243

1244 Denote the random quantity

1245

$$1246 \quad \psi = \|AZB\| = \sup_{a \in \mathbb{R}^p, b \in \mathbb{R}^q, \|a\|_2 = \|b\|_2 = 1} |a^\top AZBb|.$$

1247

1248 For any given  $a \in \mathbb{R}^p$  and  $b \in \mathbb{R}^q$ , let  $\tilde{a} \in \mathcal{N}_p(1/4)$  and  $\tilde{b} \in \mathcal{N}_q(1/4)$  be such that

1249

$$1250 \quad \|a - \tilde{a}\|_2 \leq 1/4 \quad \text{and} \quad \|b - \tilde{b}\|_2 \leq 1/4.$$

1251

1252 Then

$$1253 \quad |a^\top AZBb| \leq |(a - \tilde{a})^\top AZBb| + |\tilde{a}^\top AZB(\tilde{b} - b)| + |\tilde{a}^\top AZB\tilde{b}|.$$

1254

1255 Note that  $\|a - \tilde{a}\| \leq \frac{1}{4}$ . So

1256

$$1257 \quad |(a - \tilde{a})^\top AZBb| = \frac{1}{4} |4(a - \tilde{a})^\top AZBb| \leq \frac{\psi}{4}.$$

1258

1259 Similarly

1260

$$1261 \quad |\tilde{a}^\top AZB(\tilde{b} - b)| \leq \frac{\psi}{4}.$$

1262

1263 In addition,

1264

$$1265 \quad |\tilde{a}^\top AZB\tilde{b}| \leq \sup_{a \in \mathcal{N}_p(1/4), b \in \mathcal{N}_q(1/4)} |a^\top AZBb|.$$

1266 So for any  $a$  and  $b$ ,

1267

$$1268 \quad |a^\top AZBb| \leq \frac{1}{2}\psi + \sup_{a \in \mathcal{N}_p(1/4), b \in \mathcal{N}_q(1/4)} |a^\top AZBb|.$$

1269

1270 Taking sup over all unit vectors  $a \in \mathbb{R}^p$  and  $b \in \mathbb{R}^q$ , it follows that

1271

$$1272 \quad \psi \leq \frac{1}{2}\psi + \sup_{a \in \mathcal{N}_p(1/4), b \in \mathcal{N}_q(1/4)} |a^\top AZBb|,$$

1273

1274 or simply

1275

$$1276 \quad \psi \leq 2 \sup_{a \in \mathcal{N}_p(1/4), b \in \mathcal{N}_q(1/4)} |a^\top AZBb|.$$

1277

1278 **Step 4.** By Vershynin (2018), the cardinality of  $\mathcal{N}_p(\epsilon)$  is bounded by  $(\frac{C}{\epsilon})^p$ , and the cardinality of

1279

1280  $\mathcal{N}_q(\epsilon)$  is bounded by  $(\frac{C}{\epsilon})^q$ . Therefore

1281

$$1282 \quad \mathbb{P}(\psi \geq 2t) = \mathbb{P}\left(\sup_{a \in \mathcal{N}_p(1/4), b \in \mathcal{N}_q(1/4)} |a^\top AZBb| \geq t\right) \leq C_2^p C_2^q \sup_{a \in \mathcal{N}_p(1/4), b \in \mathcal{N}_q(1/4)} \mathbb{P}(|a^\top AZBb| \geq t)$$

$$1283 \quad \leq 2C_2^p C_2^q \exp\left(-\frac{ct^2}{\kappa^2 \|A\|^2 \|B\|^2}\right),$$

1284

1285

1286

1287 where  $c, C$  are positive constants. The desired result follows by noting  $\psi = \|AZB\|$ .  $\square$

1288

1289 **Lemma 14.** Suppose  $Z \in \mathbb{R}^{n \times m}$ , with  $Z_{ij} \stackrel{i.i.d}{\sim}$  subGaussian( $0, \kappa^2$ ). Let  $A \in \mathbb{R}^{m \times p}$  and  $B \in$

1290

1291  $\mathbb{R}^{m \times q}$  be non-random matrices. Then for any  $t > 0$

1292

$$1293 \quad \mathbb{P}(\|A^\top Z^\top ZB - n\kappa^2 A^\top B\| > t) \leq C_1 \exp\left(C(p+q) - \min\left(\frac{t^2}{n\kappa^4 \|B\|^2 \|A\|^2}, \frac{t}{\kappa^2 \|B\| \|A\|}\right)\right),$$

1294

1295

where  $C$  and  $C_1$  are positive constants.

1296 *Proof.* For any non-random  $u, v \in \mathbb{R}^m$ , it follows that

$$1297 \quad u^\top Z^\top Z v - n\kappa^2 u^\top v = \sum_{j=1}^n (u^\top Z_j)(v^\top Z_j) - \mathbb{E}\{(u^\top Z_j)(v^\top Z_j)\},$$

1301 where  $Z_j$  is the  $j$ -th row of  $Z$ . Note that  $(u^\top Z_j)$  is sub-Gaussian with parameter  $\kappa^2 \|u\|_2^2$ , and  
 1302  $(v^\top Z_j)$  is sub-Gaussian with parameter  $\kappa^2 \|v\|_2^2$ . Since  $Z$  have i.i.d. entries, it follows that  
 1303  $\{(u^\top Z_j)(v^\top Z_j)\}_{j=1}^n$  are i.i.d. sub-exponential with parameter  $\kappa^4 \|u\|_2^2 \|v\|_2^2$ . So

$$1304 \quad \mathbb{P}\left(|u^\top Z^\top Z v - n\kappa^2 u^\top v| \geq t\right) \leq 2 \exp\left(-c \min\left\{\frac{t^2}{n\kappa^4 \|u\|_2^2 \|v\|_2^2}, \frac{t}{\kappa^2 \|u\|_2 \|v\|_2}\right\}\right).$$

1307 **Step 1.** Let  $\mathcal{N}_p(\epsilon)$  be the  $\epsilon$ -net of the unit ball in  $\mathbb{R}^p$ . It follows that for any  $a \in \mathbb{R}^p$  with  $\|a\|_2 = 1$ ,  
 1308 there exists  $\tilde{a} \in \mathcal{N}_p(\epsilon)$  such that

$$1309 \quad \|a - \tilde{a}\|_2 \leq \epsilon.$$

1310 Similarly let  $\mathcal{N}_q(\epsilon)$  be the  $\epsilon$ -net of the unit ball in  $\mathbb{R}^q$ .

1311 Denote the random quantity

$$1312 \quad \psi = \|A^\top Z^\top Z B - n\kappa^2 A^\top B\| = \sup_{a \in \mathbb{R}^p, b \in \mathbb{R}^q, \|a\|_2 = \|b\|_2 = 1} |a^\top (A^\top Z^\top Z B - n\kappa^2 A^\top B)b|.$$

1313 For any given  $a \in \mathbb{R}^p$  and  $b \in \mathbb{R}^q$ , let  $\tilde{a} \in \mathcal{N}_p(1/4)$  and  $\tilde{b} \in \mathcal{N}_q(1/4)$  be such that

$$1314 \quad \|a - \tilde{a}\|_2 \leq 1/4 \quad \text{and} \quad \|b - \tilde{b}\|_2 \leq 1/4.$$

1315 Then

$$1316 \quad |a^\top (A^\top Z^\top Z B - n\kappa^2 A^\top B)b| \leq |(a - \tilde{a})^\top (A^\top Z^\top Z B - n\kappa^2 A^\top B)b|$$

$$1317 \quad + |\tilde{a}^\top (A^\top Z^\top Z B - n\kappa^2 A^\top B)(\tilde{b} - b)| + |\tilde{a}^\top (A^\top Z^\top Z B - n\kappa^2 A^\top B)\tilde{b}|.$$

1318 Note that  $\|a - \tilde{a}\|_2 \leq \frac{1}{4}$ . So

$$1319 \quad |(a - \tilde{a})^\top (A^\top Z^\top Z B - n\kappa^2 A^\top B)b| = \frac{1}{4} |\{4(a - \tilde{a})^\top\} (A^\top Z^\top Z B - n\kappa^2 A^\top B)b| \leq \frac{\psi}{4}.$$

1320 Similarly

$$1321 \quad |\tilde{a}^\top (A^\top Z^\top Z B - n\kappa^2 A^\top B)(\tilde{b} - b)| \leq \frac{\psi}{4}.$$

1322 In addition,

$$1323 \quad |\tilde{a}^\top (A^\top Z^\top Z B - n\kappa^2 A^\top B)\tilde{b}| \leq \sup_{a \in \mathcal{N}_p(1/4), b \in \mathcal{N}_q(1/4)} |a^\top (A^\top Z^\top Z B - n\kappa^2 A^\top B)b|.$$

1324 So for any  $a$  and  $b$ ,

$$1325 \quad |a^\top (A^\top Z^\top Z B - n\kappa^2 A^\top B)b| \leq \frac{1}{2}\psi + \sup_{a \in \mathcal{N}_p(1/4), b \in \mathcal{N}_q(1/4)} |a^\top (A^\top Z^\top Z B - n\kappa^2 A^\top B)b|.$$

1326 Taking sup over all unit vectors  $a \in \mathbb{R}^p$  and  $b \in \mathbb{R}^q$ , it follows that

$$1327 \quad \psi \leq \frac{1}{2}\psi + \sup_{a \in \mathcal{N}_p(1/4), b \in \mathcal{N}_q(1/4)} |a^\top (A^\top Z^\top Z B - n\kappa^2 A^\top B)b|,$$

1328 or simply

$$1329 \quad \psi \leq 2 \sup_{a \in \mathcal{N}_p(1/4), b \in \mathcal{N}_q(1/4)} |a^\top (A^\top Z^\top Z B - n\kappa^2 A^\top B)b|.$$

1330 **Step 2.** By Vershynin (2018), the cardinality of  $\mathcal{N}_p(\epsilon)$  is bounded by  $(\frac{C}{\epsilon})^p$ , and the cardinality of  
 1331  $\mathcal{N}_q(\epsilon)$  is bounded by  $(\frac{C}{\epsilon})^q$ , for a positive constant  $C$ . Therefore

$$1332 \quad \mathbb{P}(\psi \geq 2t) = \mathbb{P}\left(\sup_{a \in \mathcal{N}_p(1/4), b \in \mathcal{N}_q(1/4)} |a^\top (A^\top Z^\top Z B - n\kappa^2 A^\top B)b| \geq t\right)$$

$$\begin{aligned}
1350 & \leq C_2^p C_2^q \sup_{a \in \mathcal{N}_p(1/4), b \in \mathcal{N}_q(1/4)} \mathbb{P}(|a^\top (A^\top Z^\top Z B - n\kappa^2 A^\top B)b| \geq t) \\
1351 & = C_2^p C_2^q \sup_{a \in \mathcal{N}_p(1/4), b \in \mathcal{N}_q(1/4)} \mathbb{P}(|(Aa)^\top Z^\top Z (Bb) - n\kappa^2 (Aa)^\top (Bb)| \geq t) \\
1352 & \leq 2C_2^p C_2^q \exp\left(-c \min\left\{\frac{t^2}{n\kappa^4 \|Aa\|_2^2 \|Bb\|_2^2}, \frac{t}{\kappa^2 \|Aa\|_2 \|Bb\|_2}\right\}\right),
\end{aligned}$$

1357 where  $C_2$  is a positive constant. The desired result follows from the observation that  $\|Aa\|_2 \leq$   
1358  $\|A\| \|a\|_2 \leq \|A\|$ , and  $\|Bb\|_2 \leq \|B\| \|b\|_2 \leq \|B\|$ .  $\square$

1359 **Lemma 15.** Suppose  $Z \in \mathbb{R}^{m \times n}$  is a sub-Gaussian random matrix in the sense that for any  $u \in$   
1360  $\mathbb{R}^m, v \in \mathbb{R}^n$ , it holds that

$$1361 \quad \|u^\top Z v\|_{\psi_2} \leq \kappa \|u\|_2 \|v\|_2.$$

1362 Then with probability at least  $1 - \exp(-c(m+n))$ , it holds that

$$1363 \quad \mathbb{P}(\|Z\| > t) \leq C_1 \exp\left(C(m+n) - \frac{ct^2}{\kappa^2}\right),$$

1366 where  $c, C$  and  $C_1$  are positive constants.

1368 *Proof.* By assumption,

$$1370 \quad \mathbb{P}(|u^\top Z v| > t) \leq 2 \exp\left(-\frac{ct^2}{\kappa^2 \|u\|_2^2 \|v\|_2^2}\right).$$

1373 The rest of the proof is similar and simpler than Lemma 13 and is omitted.

1374  $\square$

## 1376 E.1 SVD FOR UNBALANCED MATRICES

1378 **Lemma 16.** Suppose

$$1379 \quad Y = X + Z \in \mathbb{R}^{n \times m},$$

1380 where  $X$  is a non-random matrix of arbitrary rank, and  $Z$  is a random matrix whose entries are  
1381 i.i.d. sub-Gaussian random variables with mean zero and the sub-Gaussian norm  $\|Z_{ij}\|_{\psi_2} = \kappa <$   
1382  $\infty$ . For any  $r \leq \min\{n, m\}$ , write the full SVD of  $X$  as

$$1383 \quad X = U \Sigma V^\top = [U_r \ U_\perp] \cdot \begin{bmatrix} \Sigma_r & \\ & \Sigma_\perp \end{bmatrix} \cdot \begin{bmatrix} V_r^\top \\ V_\perp^\top \end{bmatrix} = X_r + X_\perp.$$

1386 Here  $U_r \in \mathbb{O}_{m,r}$ ,  $V_r \in \mathbb{O}_{n,r}$  correspond to the leading  $r$  left and right singular vectors of  $X$ .  
1387 Suppose that

$$1388 \quad \{\sigma_r(X) - \sigma_{r+1}(X)\}^2 \geq C_{\text{gap}} \kappa^2 \{\sqrt{mn} + m\}$$

1389 where  $C_{\text{gap}} > 0$  is a sufficient large constant. Then with probability at least  $1 - C_1 \exp(-C_2 n)$ , it  
1390 holds that

$$1391 \quad \left\| \sin \Theta(\widehat{V}_r, V_r) \right\|^2 \leq C_3 \left\{ \frac{m\kappa^2}{(\sigma_r(X) - \sigma_{r+1}(X))^2} + \frac{\kappa^4 nm}{(\sigma_r(X) - \sigma_{r+1}(X))^4} \right\},$$

1394 where  $C_1, C_2, C_3 > 0$  are absolute constants only depending on  $C_{\text{gap}}$ .

1396 *Proof.* Note that by assumption, we have

$$1397 \quad \mathbb{E}[Z^\top Z] = n\kappa^2 I_m, \quad \mathbb{E}[Y^\top Y] = V_r \Sigma_r^2 V_r^\top + V_\perp \Sigma_\perp^2 V_\perp^\top + n\kappa^2 I_m, \quad \mathbb{E}[V_r^\top Y^\top Y V_r] = \Sigma_r^2 + n\kappa^2 I_r.$$

1399 Define the diagonal weighting matrix

$$1400 \quad M = \text{diag}\left((\sigma_1^2 + n\kappa^2)^{-1/2}, \dots, (\sigma_r^2 + n\kappa^2)^{-1/2}\right) \in \mathbb{R}^{r \times r}.$$

1402 Then it holds that

$$1403 \quad Y V_r M = (X_r + X_\perp + Z) V_r M = (X_r + Z) V_r M,$$

$$1404 \quad M^\top \mathbb{E} [V_r^\top Y^\top Y V_r] M = M^\top \mathbb{E} [V_r^\top (X_r + Z)^\top (X_r + Z) V_r] M = I_r.$$

1405  
1406 **Step 1.** For  $\sigma_r(YV_r)$ , observe that

$$1407 \quad \sigma_r^2(YV_r) = \sigma_r^2(\{X_r + Z\}V_r) = \sigma_r^2(\{X_r + Z\}V_r M M^{-1}) \geq \sigma_r^2(\{X_r + Z\}V_r M) \sigma_{\min}^2(M^{-1})$$

$$1408 \quad = \sigma_r^2(\{X_r + Z\}V_r M) \{\sigma_r^2(X) + n\kappa^2\}$$

$$1409 \quad = \sigma_r(M^\top V_r^\top \{X_r + Z\}^\top \{X_r + Z\} V_r M) \{\sigma_r^2(X) + n\kappa^2\}$$

$$1410 \quad (32)$$

1411 where the inequality follows from [Lemma 20](#).

1412 Consider the term  $\sigma_r(M^\top V_r^\top \{X_r + Z\}^\top \{X_r + Z\} V_r M)$ . Note that

$$1413 \quad M^\top V_r^\top (X_r + Z)^\top (X_r + Z) V_r M - I_r$$

$$1414 \quad = M^\top V_r^\top (X_r + Z)^\top (X_r + Z) V_r M - \mathbb{E} [M^\top V_r^\top (X_r + Z)^\top (X_r + Z) V_r M]$$

$$1415 \quad = \underbrace{M^\top V_r^\top X_r^\top X_r V_r M - \mathbb{E} [M^\top V_r^\top X_r^\top X_r V_r M]}_{=0} + M^\top V_r^\top X_r^\top Z V_r M$$

$$1416 \quad + \underbrace{M^\top V_r^\top Z^\top X_r V_r M}_{=0} + \underbrace{M^\top V_r^\top Z^\top Z V_r M - \mathbb{E} [M^\top V_r^\top Z^\top Z V_r M]}_{=0}$$

$$1417 \quad + \underbrace{\mathbb{E} [M^\top V_r^\top X_r^\top Z V_r M]}_{=0} + \underbrace{\mathbb{E} [M^\top V_r^\top Z^\top X_r V_r M]}_{=0}$$

$$1418 \quad = M^\top V_r^\top X_r^\top Z V_r M + M^\top V_r^\top Z^\top X_r V_r M + M^\top V_r^\top (Z^\top Z - n\kappa^2 I_m) V_r M. \quad (33)$$

1419 Since,

$$1420 \quad \|X_r V_r M\|^2 = \max_{k=1, \dots, r} \frac{\sigma_k^2(X)}{\sigma_k^2(X) + n\kappa^2} \leq 1, \quad \text{and} \quad \|V_r M\|^2 = \|M\|^2 = \frac{1}{\sigma_r^2(X) + n\kappa^2},$$

1421 it follows by [Lemma 13](#) that

$$1422 \quad \mathbb{P}\left(\|M^\top V_r^\top X_r^\top Z V_r M\| \geq x\right) \leq 2 \exp\left(Cr - cx^2 \frac{\sigma_r^2(X) + n\kappa^2}{\kappa^2}\right). \quad (34)$$

1423 Similarly, [Lemma 14](#) implies that

$$1424 \quad \mathbb{P}\left(\|M^\top V_r^\top (Z^\top Z - n\kappa^2 I_m) V_r M\| \geq x\right)$$

$$1425 \quad \leq 2 \exp\left(Cr - c \min\left\{x^2 \frac{(\sigma_r^2(X) + n\kappa^2)^2}{n\kappa^4}, x \frac{\sigma_r^2(X) + n\kappa^2}{\kappa^2}\right\}\right), \quad (35)$$

$$1426 \quad \leq 2 \exp\left(Cr - c \frac{\sigma_r^2(X) + n\kappa^2}{\kappa^2} \min\{x^2, x\}\right),$$

1427 where the last inequality follows from the fact that  $\frac{\{\sigma_r^2(X) + n\kappa^2\}^2}{\kappa^4 n} \geq \frac{\sigma_r^2(X) + n\kappa^2}{\kappa^2}$ . Thus, combining

$$1428 \quad \mathbb{P}\left(\|M^\top V_r^\top (X_r + Z)^\top (X_r + Z) V_r M - I_r\| \geq x\right) \leq 6 \exp\left(Cr - c \frac{\sigma_r^2(X) + n\kappa^2}{\kappa^2} \min\{x^2, x\}\right).$$

$$1429 \quad (36)$$

1430 Here we apply a union bound to the three terms in (33) with thresholds  $x/3$  each. The same tail bound as in (34) holds for  $M^\top V_r^\top Z^\top X_r V_r M$  by symmetry, and (35) controls the centered quadratic term  $M^\top V_r^\top (Z^\top Z - n\kappa^2 I_m) V_r M$ . All absolute constants are absorbed into  $C, c$ . This implies that

$$1431 \quad \mathbb{P}\left(\sigma_r(M^\top V_r^\top \{X_r + Z\}^\top \{X_r + Z\} V_r M) \geq 1 - x\right)$$

$$1432 \quad \geq 1 - 6 \exp\left(Cr - c \frac{\sigma_r^2(X) + n\kappa^2}{\kappa^2} \min\{x^2, x\}\right), \quad (37)$$

(37) and (32) together imply that

$$\mathbb{P}\left(\sigma_r^2(YV_r) \geq \{\sigma_r^2(X) + n\kappa^2\}(1-x)\right) \geq 1 - 6 \exp\left(Cr - c \frac{\sigma_r^2(X) + n\kappa^2}{\kappa^2} \min\{x^2, x\}\right).$$

Setting  $x = \frac{1}{6} \frac{\sigma_r^2(X) - \sigma_{r+1}^2(X)}{\sigma_r^2(X) + n\kappa^2}$ , we have

$$\begin{aligned} & \mathbb{P}\left(\sigma_r^2(YV_r) \geq \sigma_r^2(X) + n\kappa^2 - \frac{\sigma_r^2(X) - \sigma_{r+1}^2(X)}{6}\right) \\ & \geq 1 - 6 \exp\left(Cr - c \min\left\{\frac{1}{36\kappa^2} \frac{(\sigma_r^2(X) - \sigma_{r+1}^2(X))^2}{\sigma_r^2(X) + n\kappa^2}, \frac{\sigma_r^2(X) - \sigma_{r+1}^2(X)}{6\kappa^2}\right\}\right). \end{aligned} \quad (38)$$

**Step 2.** We upper bound the term  $\sigma_{r+1}^2(Y)$ . Note that

$$\sigma_{r+1}(Y) = \min_{\text{rank}(B) \leq r} \|Y - B\| \leq \|Y - Y \cdot V_r V_r^\top\| = \sigma_{\max}(YV_\perp).$$

Moreover,

$$\begin{aligned} \sigma_{\max}^2(YV_\perp) &= \|V_\perp^\top Y^\top Y V_\perp\| = \|V_\perp^\top (X_r + X_\perp + Z)^\top (X_r + X_\perp + Z) V_\perp\| \\ &= \|V_\perp^\top (X_\perp + Z)^\top (X_\perp + Z) V_\perp\| \\ &\leq \|V_\perp^\top Z^\top Z V_\perp\| + \|V_\perp^\top Z^\top X_\perp V_\perp\| + \|V_\perp^\top X_\perp^\top Z V_\perp\| + \|V_\perp^\top X_\perp^\top X_\perp V_\perp\| \\ &= \underbrace{\|V_\perp^\top Z^\top Z V_\perp\|}_{I_1} + 2 \underbrace{\|V_\perp^\top Z^\top X_\perp V_\perp\|}_{I_2} + \underbrace{\|V_\perp^\top X_\perp^\top X_\perp V_\perp\|}_{I_3}. \end{aligned} \quad (39)$$

For the term  $I_3$ , we have

$$I_3 = \sigma_1^2(X_\perp V_\perp) = \sigma_1^2(U_\perp \Sigma_\perp V_\perp^\top V_\perp) = \sigma_1^2(\Sigma_\perp) = \sigma_{r+1}^2(X). \quad (40)$$

For  $I_2$ , note that

$$\|X_\perp V_\perp\|^2 = \|U_\perp \Sigma_\perp\|^2 = \sigma_{r+1}^2(X), \quad \text{and} \quad \|V_\perp\|^2 = 1.$$

it follows from [Lemma 13](#) that

$$\mathbb{P}(I_2 \geq x) \leq 2 \exp\left(C_1 m - \frac{c_1 x^2}{\kappa^2 \sigma_{r+1}^2(X)}\right). \quad (41)$$

For  $I_1$ , note that by [Lemma 14](#) and the fact that  $V_\perp^\top V_\perp = I_{m-r}$ , we have

$$\begin{aligned} & \mathbb{P}\left(\|V_\perp^\top Z^\top Z V_\perp - n\kappa^2 I_{m-r}\| \geq t\right) \leq 2 \exp\left(C_2 m - c_2 \min\left\{\frac{t^2}{n\kappa^4}, \frac{t}{\kappa^2}\right\}\right), \\ & \implies \mathbb{P}(I_1 \geq n\kappa^2(1+t)) \leq 2 \exp(C_2 m - c_2 n \min\{t^2, t\}). \end{aligned} \quad (42)$$

Combining the calculations in this step, with  $x = \kappa \sigma_{r+1}(X) \sqrt{\frac{2C_1}{c_1} m}$  in (41), and with  $t = \frac{\sigma_r^2(X) - \sigma_{r+1}^2(X)}{6n\kappa^2}$  in (42), it follows that

$$\begin{aligned} & \mathbb{P}\left(\sigma_{r+1}^2(Y) \geq n\kappa^2 + \frac{\sigma_r^2(X) - \sigma_{r+1}^2(X)}{6} + \kappa \sigma_{r+1}(X) \sqrt{\frac{2C_1}{c_1} m} + \sigma_{r+1}^2(X)\right) \\ & \leq 2 \exp\left(C_2 m - c_2 \min\left\{\frac{(\sigma_r^2(X) - \sigma_{r+1}^2(X))^2}{36\kappa^4 n}, \frac{\sigma_r^2(X) - \sigma_{r+1}^2(X)}{6\kappa^2}\right\}\right) + 2 \exp(-C_3 m). \end{aligned} \quad (43)$$

**Step 3.** Recall we define

$$M = \text{diag}\left((\sigma_1^2 + n\kappa^2)^{-1/2}, \dots, (\sigma_r^2 + n\kappa^2)^{-1/2}\right) \in \mathbb{R}^{r \times r}.$$

We have

$$\begin{aligned}
\|\mathcal{P}_{YV_r} YV_\perp\| &= \|\mathcal{P}_{YV_r M} YV_\perp\| \\
&= \left\| (YV_r M) \left( (YV_r M)^\top (YV_r M) \right)^{-1} (YV_r M)^\top YV_\perp \right\| \\
&\leq \left\| (YV_r M) \left( (YV_r M)^\top (YV_r M) \right)^{-1} \right\| \|M^\top V_r^\top Y^\top YV_\perp\| \\
&\leq \sigma_{\min}^{-1}(YV_r M) \|M^\top V_r^\top Y^\top YV_\perp\| = \sigma_r^{-1}(YV_r M) \|M^\top V_r^\top Y^\top YV_\perp\|, \quad (44)
\end{aligned}$$

where the first equality follows from the fact that  $YV_r$  and  $YV_r M$  have the same column spaces (since  $M$  is invertible), the last inequality follows from Lemma 18, and for the last equality we use that the singular values of  $YV_r M$  are in nonincreasing order so that its smallest singular value equals  $\sigma_r(YV_r M)$ .

By (36), we have for every  $x > 0$

$$\mathbb{P}\left(\|M^\top V_r^\top (X_r + Z)^\top (X_r + Z) V_r M - I_r\| \geq x\right) \leq 6 \exp\left(Cr - c \frac{\sigma_r^2(X) + n\kappa^2}{\kappa^2} \min\{x^2, x\}\right).$$

Taking  $x = \frac{1}{2}$  gives

$$\mathbb{P}\left(\|M^\top V_r^\top (X_r + Z)^\top (X_r + Z) V_r M - I_r\| < \frac{1}{2}\right) \geq 1 - 6 \exp\left(Cr - c \frac{\sigma_r^2(X) + n\kappa^2}{4\kappa^2}\right). \quad (45)$$

In particular, on this event all eigenvalues of  $M^\top V_r^\top (X_r + Z)^\top (X_r + Z) V_r M$  are at least  $1/2$ , so  $\sigma_r^2(YV_r M) \geq 1/2$  with the same probability bound. Consider  $\|M^\top V_r^\top Y^\top YV_\perp\|$ . Since  $V_r^\top X_\perp^\top = 0$ ,  $X_r V_\perp = 0$  and  $X_\perp^\top X_r = 0$ , it follows that

$$\begin{aligned}
M^\top V_r^\top Y^\top YV_\perp &= M^\top V_r^\top (X_r + X_\perp + Z)^\top (X_r + X_\perp + Z) V_\perp \\
&= M^\top V_r^\top X_r^\top ZV_\perp + M^\top V_r^\top Z^\top X_\perp V_\perp + M^\top V_r^\top Z^\top ZV_\perp \\
&= M^\top V_r^\top X_r^\top ZV_\perp + M^\top V_r^\top Z^\top X_\perp V_\perp + M^\top V_r^\top Z^\top ZV_\perp - \underbrace{M^\top V_r^\top (n\kappa^2 I_m)}_{=0} V_\perp,
\end{aligned}$$

Since,

$$\|X_r V_r M\|^2 \leq 1, \|V_r M\|^2 = \frac{1}{\sigma_r^2(X) + n\kappa^2} \text{ and } \|X_\perp V_\perp\|^2 = \|X_\perp\|^2 = \sigma_{r+1}^2(X),$$

it follows from Lemma 13 that

$$\begin{aligned}
\mathbb{P}\left(\|M^\top V_r^\top X_r^\top ZV_\perp\| \geq x\right) &\leq 2 \exp\left(Cm - \frac{cx^2}{\kappa^2}\right), \\
\mathbb{P}\left(\|M^\top V_r^\top Z^\top X_\perp V_\perp\| \geq x\right) &\leq 2 \exp\left(Cm - \frac{cx^2}{\kappa^2} \frac{\sigma_r^2(X) + n\kappa^2}{\sigma_{r+1}^2(X)}\right) \leq 2 \exp\left(Cm - \frac{cx^2}{\kappa^2}\right). \quad (46)
\end{aligned}$$

Similarly, Lemma 14 implies that

$$\begin{aligned}
&\mathbb{P}\left(\|M^\top V_r^\top (Z^\top Z - n\kappa^2 I_m) V_\perp\| \geq x\right) \\
&\leq 2 \exp\left(Cm - c \min\left\{x^2 \frac{\sigma_r^2(X) + n\kappa^2}{n\kappa^4}, x \frac{\sqrt{\sigma_r^2(X) + n\kappa^2}}{\kappa^2}\right\}\right), \quad (47) \\
&\leq 2 \exp\left(Cm - c \min\left\{\frac{x^2}{\kappa^2}, x \frac{\sqrt{\sigma_r^2(X) + n\kappa^2}}{\kappa^2}\right\}\right),
\end{aligned}$$

where the last inequality uses  $\frac{\sigma_r^2(X) + n\kappa^2}{n\kappa^2} \geq 1$ . Thus, combining (44), (45), (46) and (47) with  $x = \kappa \sqrt{\frac{2C}{c} m}$ , we have

$$\mathbb{P}\left(\|\mathcal{P}_{YV_r} YV_\perp\|^2 \geq \frac{36C}{c} m\kappa^2\right) \leq 6 \exp\left(Cr - c \frac{\sigma_r^2(X) + n\kappa^2}{4\kappa^2}\right) + 4 \exp(-Cm) \quad (48)$$

$$+ 2 \exp\left(Cm - c \min\left\{\frac{2C}{c} m, \sqrt{\frac{2C}{c} m \frac{\sigma_r^2(X) + n\kappa^2}{\kappa^2}}\right\}\right).$$

**Step 4.** Define the event

$$\begin{aligned} \mathcal{E} = & \left\{ \sigma_r^2(YV_r) \geq \sigma_r^2(X) + n\kappa^2 - \frac{\sigma_r^2(X) - \sigma_{r+1}^2(X)}{6}; \right. \\ & \sigma_{r+1}^2(Y) \leq n\kappa^2 + \frac{\sigma_r^2(X) - \sigma_{r+1}^2(X)}{6} + \kappa\sigma_{r+1}(X)\sqrt{\frac{2C}{c}m} + \sigma_{r+1}^2(X); \\ & \left. \|\mathcal{P}_{YV_r} YV_{\perp}\|^2 \leq \frac{8C}{c} m\kappa^2 \right\}. \end{aligned}$$

It follows from (38), (43) and (48) that by the union bound,

$$\mathbb{P}(\mathcal{E}^c) \leq 6 \exp\left(Cr - c \min\left\{\frac{1}{36\kappa^2} \frac{(\sigma_r^2(X) - \sigma_{r+1}^2(X))^2}{\sigma_r^2(X) + n\kappa^2}, \frac{\sigma_r^2(X) - \sigma_{r+1}^2(X)}{6\kappa^2}\right\}\right) \quad (49)$$

$$+ 2 \exp\left(Cm - c \min\left\{\frac{(\sigma_r^2(X) - \sigma_{r+1}^2(X))^2}{36\kappa^4 n}, \frac{\sigma_r^2(X) - \sigma_{r+1}^2(X)}{6\kappa^2}\right\}\right) + 2 \exp(-Cm) \quad (50)$$

$$+ 6 \exp\left(Cr - c \frac{\sigma_r^2(X) + n\kappa^2}{4\kappa^2}\right) + 4 \exp(-Cm) \quad (51)$$

$$+ 2 \exp\left(Cm - c \min\left\{\frac{2C}{c} m, \sqrt{\frac{2C}{c} m \frac{\sigma_r^2(X) + n\kappa^2}{\kappa^2}}\right\}\right). \quad (52)$$

In what follows, we show that under the SNR assumption

$$(\sigma_r(X) - \sigma_{r+1}(X))^2 \geq C_{\text{gap}}\kappa^2(\sqrt{nm} + m)$$

with sufficient large absolute constant  $C_{\text{gap}} > 0$ , we have

$$\mathbb{P}(\mathcal{E}^c) \leq C \exp(-Cm),$$

where  $C > 0$  is an absolute constant, appropriately scaled to absorb the other constants.

We illustrate how to bound (49), as the rest of the terms can be bounded in a similar and simpler way. Note that

$$\begin{aligned} \frac{1}{36\kappa^2} \frac{(\sigma_r^2(X) - \sigma_{r+1}^2(X))^2}{\sigma_r^2(X) + n\kappa^2} & \geq \frac{(\sigma_r^2(X) - \sigma_{r+1}^2(X))^2}{72\kappa^2} \min\left\{\frac{1}{\sigma_r^2(X)}, \frac{1}{n\kappa^2}\right\} \\ & \geq \min\left\{\frac{(\sigma_r^2(X) - \sigma_{r+1}^2(X))^2}{72\kappa^2\sigma_r^2(X)}, \frac{(\sigma_r^2(X) - \sigma_{r+1}^2(X))^2}{72n\kappa^4}\right\}. \end{aligned}$$

We have

$$\begin{aligned} \frac{(\sigma_r^2(X) - \sigma_{r+1}^2(X))^2}{72\kappa^2\sigma_r^2(X)} & = \frac{(\sigma_r(X) + \sigma_{r+1}(X))^2 (\sigma_r(X) - \sigma_{r+1}(X))^2}{72\kappa^2\sigma_r^2(X)} \geq \frac{(\sigma_r(X) - \sigma_{r+1}(X))^2}{72\kappa^2} \geq \frac{2C}{c} m, \\ & \frac{(\sigma_r^2(X) - \sigma_{r+1}^2(X))^2}{72\kappa^4 n} \geq \frac{(\sigma_r(X) - \sigma_{r+1}(X))^4}{72\kappa^4 n} \geq \frac{2C}{c} m. \end{aligned}$$

So

$$\frac{1}{36\kappa^2} \frac{(\sigma_r^2(X) - \sigma_{r+1}^2(X))^2}{\sigma_r^2(X) + n\kappa^2} \geq \frac{2C}{c} m.$$

In addition,

$$\frac{\sigma_R^2(X) - \sigma_{R+1}^2(X)}{6\kappa^2} \geq \frac{(\sigma_R^2(X) - \sigma_{R+1}^2(X))^2}{72\kappa^2\sigma_R^2(X)} \geq \frac{2C}{c} m.$$

So (49)  $\leq C \exp(-Cm)$ , for some absolute constant  $C > 0$ .

**Step 5.** Under the event  $\mathcal{E}$ , by [Lemma 24](#), we have that

$$\begin{aligned}
\left\| \sin \Theta \left( \widehat{V}_r, V_r \right) \right\|^2 &\leq \frac{\sigma_r^2(YV_r) \|\mathcal{P}_{YV_r} YV_\perp\|^2}{\left( \sigma_r^2(YV_r) - \sigma_{r+1}^2(Y) \right)^2} \leq C_7 \frac{\sigma_r^2(YV_r) m \kappa^2}{\left( \sigma_r^2(YV_r) - \sigma_{r+1}^2(Y) \right)^2} \\
&\leq C_8 \frac{\left( \sigma_r^2(X) + n \kappa^2 - \frac{\sigma_r^2(X) - \sigma_{r+1}^2(X)}{6} \right) m \kappa^2}{\left( \sigma_r^2(X) + n \kappa^2 - \frac{\sigma_r^2(X) - \sigma_{r+1}^2(X)}{6} - \sigma_{r+1}^2(Y) \right)^2} \\
&\leq C_8 \frac{\left( \sigma_r^2(X) + n \kappa^2 - \frac{\sigma_r^2(X) - \sigma_{r+1}^2(X)}{6} \right) m \kappa^2}{\left( \left(1 - \frac{1}{3}\right) \left( \sigma_r^2(X) - \sigma_{r+1}^2(X) \right) - \kappa \sigma_{r+1}(X) \sqrt{\frac{2C}{c} m} \right)^2} \\
&\leq C_9 \frac{\left( \sigma_r^2(X) + n \kappa^2 - \frac{\sigma_r^2(X) - \sigma_{r+1}^2(X)}{6} \right) m \kappa^2}{\left(1 - \frac{1}{2}\right)^2 \left( \sigma_r^2(X) - \sigma_{r+1}^2(X) \right)^2} \\
&\leq C_{10} \frac{\left( \sigma_r^2(X) + n \kappa^2 - \frac{\sigma_r^2(X) - \sigma_{r+1}^2(X)}{6} \right) m \kappa^2}{\left( \sigma_r^2(X) - \sigma_{r+1}^2(X) \right)^2},
\end{aligned}$$

Here, the third inequality follows from the fact that  $x^2/(x^2 - y^2)^2$  is a decreasing function of  $x$  and an increasing function of  $y$  when  $x > y \geq 0$ , together with the fact that the event  $\mathcal{E}$  holds.

The fifth inequality follows from the fact that, under the assumption  $\left( \sigma_r(X) - \sigma_{r+1}(X) \right)^2 \geq C_{\text{gap}} \kappa^2 (\sqrt{nm} + m)$  with  $C_{\text{gap}} > 0$  being large enough,

$$\begin{aligned}
\frac{\left( \sigma_r^2(X) - \sigma_{r+1}^2(X) \right)^2}{36} &= \left( \sigma_r(X) + \sigma_{r+1}(X) \right)^2 \frac{\left( \sigma_r(X) - \sigma_{r+1}(X) \right)^2}{36} \\
&\geq \sigma_r^2(X) \frac{C_{\text{gap}} m \kappa^2}{36} \geq C m \kappa^2 \sigma_r^2(X) \geq C m \kappa^2 \sigma_{r+1}^2(X).
\end{aligned}$$

Therefore, with probability at least  $1 - C \exp(-Cm)$ ,

$$\begin{aligned}
\left\| \sin \Theta \left( \widehat{V}_r, V_r \right) \right\|^2 &\leq C_3 \frac{\left( \sigma_r^2(X) + n \kappa^2 - \frac{\sigma_r^2(X) - \sigma_{r+1}^2(X)}{6} \right) m \kappa^2}{\left( \sigma_r^2(X) - \sigma_{r+1}^2(X) \right)^2} \\
&\leq C_3 \frac{\left( \sigma_r^2(X) + n \kappa^2 \right) m \kappa^2}{\left( \sigma_r^2(X) - \sigma_{r+1}^2(X) \right)^2} = C_3 \frac{\sigma_r^2(X) m \kappa^2}{\left( \sigma_r^2(X) - \sigma_{r+1}^2(X) \right)^2} + C_3 \frac{n m \kappa^4}{\left( \sigma_r^2(X) - \sigma_{r+1}^2(X) \right)^2} \\
&\leq C_4 \left\{ \frac{m \kappa^2}{\left( \sigma_r(X) - \sigma_{r+1}(X) \right)^2} + \frac{\kappa^4 n m}{\left( \sigma_r(X) - \sigma_{r+1}(X) \right)^4} \right\},
\end{aligned}$$

where the third inequality follows from the observation that

$$\frac{\sigma_r^2(X)}{\left( \sigma_r^2(X) - \sigma_{r+1}^2(X) \right)^2} = \frac{\sigma_r^2(X)}{\left( \sigma_r(X) + \sigma_{r+1}(X) \right)^2 \left( \sigma_r(X) - \sigma_{r+1}(X) \right)^2} \leq \frac{1}{\left( \sigma_r(X) - \sigma_{r+1}(X) \right)^2},$$

and last display follows from

$$\sigma_r^2(X) - \sigma_{r+1}^2(X) = \left( \sigma_r(X) + \sigma_{r+1}(X) \right) \left( \sigma_r(X) - \sigma_{r+1}(X) \right) \geq \left( \sigma_r(X) - \sigma_{r+1}(X) \right)^2.$$

□

**Corollary 17.** *Suppose the conditions of Theorem 1 hold, in particular the condition in Equation (3) for each mode- $k$  unfolding  $\mathcal{M}_k(X^*)$  with target rank  $r_k$ . Let  $U_k^{(0)}$  be the matrix of top  $r_k$  left singular vectors of the mode- $k$  unfolding  $Y^{(k)} := \mathcal{M}_k(Y)$ . Then for each  $k \in \{1, 2, 3\}$ , with probability at least  $1 - C_1 \exp(-C_2 p_k)$ ,*

$$\left\| \sin \Theta \left( U_k^{(0)}, U_k^* \right) \right\| \leq \frac{1}{2\sqrt{r_{\max}}}.$$

*Proof.* Apply [Lemma 16](#) to  $Y^{(k)} = \mathcal{M}_k(Y) \in \mathbb{R}^{p_k \times p_{-k}}$  with signal  $X^{(k)} = \mathcal{M}_k(X^*)$  and noise  $Z^{(k)} = \mathcal{M}_k(Z)$ , where  $p_{-k} := \prod_{j \neq k} p_j$ . Use rank  $r = r_k$  and identify  $n := p_k$  (rows) and  $m := p_{-k}$  (columns). The lemma (applied to left singular vectors, or equivalently to the transpose) gives

$$\|\sin \Theta(U_k^{(0)}, U_k^*)\|^2 \leq C \left\{ \frac{p_k \kappa^2}{\Delta_k^2} + \frac{\kappa^4 p_k p_{-k}}{\Delta_k^4} \right\},$$

where  $\Delta_k := \sigma_{r_k}(\mathcal{M}_k(X^*)) - \sigma_{r_k+1}(\mathcal{M}_k(X^*))$  is the mode- $k$  spectral gap.

By the assumption (3) in [Theorem 1](#) (applied to mode  $k$ ),

$$\Delta_k^2 \geq C_{\text{gap}} \kappa^2 \left( \sqrt{p_k p_{-k} r_{\max}} + r_{\max} \sum_{j=1}^3 p_j \right).$$

Choosing  $C_{\text{gap}}$  sufficiently large makes the right-hand side above at most  $1/(4r_{\max})$ , hence

$$\|\sin \Theta(U_k^{(0)}, U_k^*)\| \leq \frac{1}{2\sqrt{r_{\max}}}.$$

The probability bound  $1 - C_1 \exp(-C_2 p_k)$  matches the row dimension in the matrix lemma.  $\square$

## F MATRIX PERTURBATION BOUNDS

**Lemma 18.** *Suppose that  $A \in \mathbb{R}^{n \times r}$ . Then*

$$\|A(A^\top A)^{-1}\| \leq \sigma_r^{-1}(A).$$

*Proof.* If  $\sigma_r(A) = 0$ , then the desired result trivially follows. So suppose  $\text{rank}(A) = r$ . Therefore  $A^\top A$  is invertible. Let the SVD of  $A$  satisfies  $A = U_A \Sigma_A V_A^\top$ , then

$$\|A(A^\top A)^{-1}\| = \|U_A \Sigma_A V_A^\top (V_A \Sigma_A^2 V_A^\top)^{-1}\| = \|U_A \Sigma_A^{-1} V_A^\top\| = \sigma_{\min}^{-1}(A) = \sigma_r^{-1}(A).$$

**Lemma 19.** *Suppose  $A \in \mathbb{R}^{m \times n}$  and  $B \in \mathbb{R}^{n \times k}$  are any two matrices. Then*

$$\sigma_j(AB) \leq \sigma_j(A) \sigma_{\max}(B).$$

*Proof.* Let  $\lambda_j(M)$  denote the  $j$ -th eigenvalues of  $M$  in the absolute value order. Then

$$\sigma_j(AB) = \sqrt{\lambda_j(ABB^\top A^\top)} \quad \text{and} \quad \sigma_j(A) = \sqrt{\lambda_j(AA^\top)}. \quad (53)$$

Since  $BB^\top \preceq \sigma_{\max}^2(B)I_n$ , it follows that

$$ABB^\top A^\top \preceq A(\sigma_{\max}^2(B)I_n)A^\top = \sigma_{\max}^2(B)AA^\top.$$

By the monotonicity of eigenvalues under the positive definite matrices, it follows that

$$\lambda_j(ABB^\top A^\top) \leq \sigma_{\max}^2(B) \lambda_j(AA^\top). \quad (54)$$

The desired result follows from (53).  $\square$

**Lemma 20.** *Suppose  $A \in \mathbb{R}^{m \times n}$  and  $B \in \mathbb{R}^{n \times n}$  are any two matrices. Then*

$$\sigma_j(AB) \geq \sigma_j(A) \sigma_{\min}(B).$$

*Proof.* Suppose  $\sigma_{\min}(B) = 0$ . Then the desired result immediately follows. Therefore it suffices to assume  $\sigma_{\min}(B) > 0$  and  $B$  is invertible. It suffices to observe that

$$\sigma_j(A) = \sigma_j(ABB^{-1}) \leq \sigma_j(AB) \sigma_{\max}(B^{-1}) = \sigma_j(AB) \sigma_{\min}^{-1}(B),$$

where the inequality follows from [Lemma 19](#).  $\square$

**Lemma 21.** For any real matrices  $A \in \mathbb{R}^{n \times m}$  and  $B \in \mathbb{R}^{m \times m}$ , it holds that

$$\|AB\|_{\text{F}} \geq \sigma_{\min}(B)\|A\|_{\text{F}}.$$

*Proof of Lemma 21.* Since  $B$  is a square matrix, it follows that

$$\lambda_{\min}(BB^{\top}) = \sigma_{\min}^2(B),$$

where  $\lambda_{\min}(\cdot)$  denotes the minimum eigenvalue. Note that

$$BB^{\top} \succeq \lambda_{\min}(BB^{\top})I_m.$$

Therefore

$$ABB^{\top}A^{\top} \succeq A\{\lambda_{\min}(BB^{\top})I_m\}A^{\top},$$

and so

$$\text{tr}(ABB^{\top}A^{\top}) \geq \text{tr}(A\{\lambda_{\min}(BB^{\top})I_m\}A^{\top}).$$

Then

$$\|AB\|_{\text{F}}^2 = \text{tr}(ABB^{\top}A^{\top}) \geq \text{tr}(A\{\lambda_{\min}(BB^{\top})I_m\}A^{\top}) = \lambda_{\min}(BB^{\top})\text{tr}(AA^{\top}) = \sigma_{\min}^2(B)\|A\|_{\text{F}}^2.$$

□

**Lemma 22.** Let  $A \in \mathbb{R}^{p \times q}$  and  $U \in \mathbb{O}^{q \times r}$ . Then

$$\|AUU^{\top}\|_{\text{F}} = \|AU\|_{\text{F}}.$$

*Proof.* Observe that

$$\|AUU^{\top}\|_{\text{F}}^2 = \text{tr}(AUU^{\top}UU^{\top}A^{\top}) = \text{tr}(AUU^{\top}A^{\top}) = \|AU\|_{\text{F}}^2.$$

□

**Lemma 23.** Suppose  $B, Z \in \mathbb{R}^{n \times m}$ . For all  $1 \leq R \leq \min\{n, m\}$ , write the full SVD of  $A$  as

$$A = B + Z = \widehat{U}\widehat{\Sigma}\widehat{V}^{\top} = \begin{bmatrix} \widehat{U}_{(R)} & \widehat{U}_{\perp} \end{bmatrix} \cdot \begin{bmatrix} \widehat{\Sigma}_{(R)} & \\ & \widehat{\Sigma}_{\perp} \end{bmatrix} \cdot \begin{bmatrix} \widehat{V}_{(R)}^{\top} \\ \widehat{V}_{\perp}^{\top} \end{bmatrix},$$

where  $\widehat{U}_{(R)} \in \mathbb{O}_{n,R}$ ,  $\widehat{V}_{(R)} \in \mathbb{O}_{m,R}$  correspond to the leading  $R$  left and right singular vectors; and  $\widehat{U}_{\perp} \in \mathbb{O}_{n,n-R}$ ,  $\widehat{V}_{\perp} \in \mathbb{O}_{m,m-R}$  correspond to their orthonormal complement. We have

$$\begin{aligned} \left\| \mathcal{P}_{\widehat{U}_{\perp}} B \right\|_{\text{F}} &\leq 3 \sqrt{\sum_{j=R+1}^{\min\{n,m\}} \sigma_j^2(B)} + 2 \min \left\{ \sqrt{R} \|Z\|, \|Z\|_{\text{F}} \right\} \\ &= 3 \|B_{(R)} - B\|_{\text{F}} + 2 \min \left\{ \sqrt{R} \|Z\|, \|Z\|_{\text{F}} \right\}, \end{aligned}$$

where  $B_{(R)}$  denote the rank- $R$  truncated SVD of  $B$ , this is, if  $B = U\Sigma V^{\top}$  then  $B_{(R)} := U_{(R)}\Sigma_{(R)}V_{(R)}^{\top}$ .

*Proof.* Without loss of generality, assume  $n \leq m$ . For  $A \in \mathbb{R}^{n \times m}$ , let  $\Sigma(A) \in \mathbb{R}^{n \times m}$  denote the non-negative diagonal matrices whose diagonal entries are the non-increasingly ordered singular values of  $A$ . For all  $1 \leq R \leq n$ , let  $B_{(R)}$  denote the truncated SVD of  $B$  with rank  $R$ , and we have by the Eckart–Young–Mirsky theorem

$$\|B_{(R)} - B\|_{\text{F}} = \sqrt{\sum_{j=R+1}^n \sigma_j^2(B)}.$$

For a matrix  $A \in \mathbb{R}^{m \times n}$ , let  $\Sigma(A) \in \mathbb{R}^{m \times n}$  be a non-negative (rectangular) diagonal matrix whose diagonal entries are the non-increasingly ordered singular values of  $A$ .

We have that

$$\begin{aligned}
& \left\| \mathcal{P}_{\hat{U}_\perp} B \right\|_{\mathbb{F}} \leq \left\| \mathcal{P}_{\hat{U}_\perp} B_{(R)} \right\|_{\mathbb{F}} + \left\| \mathcal{P}_{\hat{U}_\perp} (B - B_{(R)}) \right\|_{\mathbb{F}} = \sqrt{\sum_{j=1}^R \sigma_j^2(\mathcal{P}_{\hat{U}_\perp} B_{(R)})} + \left\| \mathcal{P}_{\hat{U}_\perp} (B - B_{(R)}) \right\|_{\mathbb{F}} \\
& \leq \sqrt{\sum_{j=1}^R \sigma_j^2(\mathcal{P}_{\hat{U}_\perp} B_{(R)})} + \|B - B_{(R)}\|_{\mathbb{F}} = \sqrt{\sum_{j=1}^R \sigma_j^2(\mathcal{P}_{\hat{U}_\perp} B_{(R)})} + \sqrt{\sum_{j=R+1}^n \sigma_j^2(B)} \\
& \leq \left\| (\sigma_1(\mathcal{P}_{\hat{U}_\perp} B_{(R)}) - \sigma_1(\mathcal{P}_{\hat{U}_\perp} B), \dots, \sigma_R(\mathcal{P}_{\hat{U}_\perp} B_{(R)}) - \sigma_R(\mathcal{P}_{\hat{U}_\perp} B))^\top \right\|_2 + \left\| (\sigma_1(\mathcal{P}_{\hat{U}_\perp} B), \dots, \sigma_R(\mathcal{P}_{\hat{U}_\perp} B))^\top \right\|_2 \\
& \quad + \sqrt{\sum_{j=R+1}^n \sigma_j^2(B)} \\
& \leq \left\| \Sigma(\mathcal{P}_{\hat{U}_\perp} B_{(R)}) - \Sigma(\mathcal{P}_{\hat{U}_\perp} B) \right\|_{\mathbb{F}} + \left\| (\sigma_1(\mathcal{P}_{\hat{U}_\perp} B), \dots, \sigma_R(\mathcal{P}_{\hat{U}_\perp} B))^\top \right\|_2 + \sqrt{\sum_{j=R+1}^n \sigma_j^2(B)} \\
& \leq \left\| \mathcal{P}_{\hat{U}_\perp} (B_{(R)} - B) \right\|_{\mathbb{F}} + \sqrt{\sum_{j=1}^R \sigma_j^2(\mathcal{P}_{\hat{U}_\perp} B)} + \sqrt{\sum_{j=R+1}^n \sigma_j^2(B)} \\
& \leq \sqrt{\sum_{j=1}^R \sigma_j^2(\mathcal{P}_{\hat{U}_\perp} B)} + 2\sqrt{\sum_{j=R+1}^n \sigma_j^2(B)},
\end{aligned}$$

where the first equality follows from  $\text{rank}(B_{(R)}) = R$ , and the fifth inequality follows from Theorem 26. To upper bound  $\sqrt{\sum_{j=1}^R \sigma_j^2(\mathcal{P}_{\hat{U}_\perp} B)}$ , we first consider  $\sqrt{\sum_{j=1}^R \sigma_j^2(\mathcal{P}_{\hat{U}_\perp} A)}$ . Note that

$$\mathcal{P}_{\hat{U}_\perp} A = \sum_{j=R+1}^n \sigma_j(A) \hat{u}_j \hat{v}_j^\top,$$

where  $\hat{u}_j$  and  $\hat{v}_j$  are the left and right singular vectors associated with the  $j$ th largest singular value  $\sigma_j(A)$ . Note that  $\sigma_j(A) = \sigma_j(B) = 0$  for  $j > n$ . It follows that

$$\begin{aligned}
& \sqrt{\sum_{j=1}^R \sigma_j^2(\mathcal{P}_{\hat{U}_\perp} A)} = \sqrt{\sum_{j=R+1}^{2R} \sigma_j^2(A)} = \|(\sigma_{R+1}(A), \dots, \sigma_{2R}(A))^\top\| \\
& \leq \|(\sigma_{R+1}(A) - \sigma_{R+1}(B), \dots, \sigma_{2R}(A) - \sigma_{2R}(B))^\top\| + \|(\sigma_{R+1}(B), \dots, \sigma_{2R}(B))^\top\| \\
& \leq \min \left\{ \sqrt{R} \|Z\|, \|Z\|_{\mathbb{F}} \right\} + \sqrt{\sum_{j=R+1}^n \sigma_j^2(B)}, \tag{55}
\end{aligned}$$

where the first inequality follows from the triangle inequality, and second inequality follows from Weyl's inequality (Weyl, 1912), i.e.  $|\sigma_j(A) - \sigma_j(B)| \leq \|A - B\|$  for all  $1 \leq j \leq n$ , as well as the fact that

$$\|(\sigma_{R+1}(A) - \sigma_{R+1}(B), \dots, \sigma_{2R}(A) - \sigma_{2R}(B))^\top\| \leq \|\Sigma(A) - \Sigma(B)\|_{\mathbb{F}} \leq \|Z\|_{\mathbb{F}},$$

where the last inequality follows from Theorem 26. It then follows from (55),

$$\begin{aligned}
& \sqrt{\sum_{j=1}^R \sigma_j^2(\mathcal{P}_{\hat{U}_\perp} B)} = \left\| (\sigma_1(\mathcal{P}_{\hat{U}_\perp} (A - Z)), \dots, \sigma_R(\mathcal{P}_{\hat{U}_\perp} (A - Z)))^\top \right\| \\
& \leq \left\| (\sigma_1(\mathcal{P}_{\hat{U}_\perp} (A - Z)) - \sigma_1(\mathcal{P}_{\hat{U}_\perp} A), \dots, \sigma_R(\mathcal{P}_{\hat{U}_\perp} (A - Z)) - \sigma_R(\mathcal{P}_{\hat{U}_\perp} A))^\top \right\| \\
& \quad + \left\| (\sigma_1(\mathcal{P}_{\hat{U}_\perp} A), \dots, \sigma_R(\mathcal{P}_{\hat{U}_\perp} A))^\top \right\|
\end{aligned}$$

$$\begin{aligned}
&\leq \min \left\{ \sqrt{R} \|\mathcal{P}_{\hat{U}_\perp} Z\|, \|\mathcal{P}_{\hat{U}_\perp} Z\|_F \right\} + \sqrt{\sum_{j=1}^R \sigma_j^2(\mathcal{P}_{\hat{U}_\perp} A)} \\
&\leq \min \left\{ \sqrt{R} \|Z\|, \|Z\|_F \right\} + \sqrt{\sum_{j=1}^R \sigma_j^2(P_{\hat{U}_\perp} A)} \\
&\leq 2 \min \left\{ \sqrt{R} \|Z\|, \|Z\|_F \right\} + \sqrt{\sum_{j=R+1}^n \sigma_j^2(B)},
\end{aligned}$$

where the first two inequalities follow from the same arguments as in (55). Consequently,

$$\|\mathcal{P}_{\hat{U}_\perp} B\|_F \leq 3 \sqrt{\sum_{j=R+1}^n \sigma_j^2(B)} + 2 \min \left\{ \sqrt{R} \|Z\|, \|Z\|_F \right\}.$$

□

**Lemma 24** (Proposition 1 of Cai & Zhang (2018)). *Suppose  $Y \in \mathbb{R}^{m \times n}$ ,  $\hat{V} = [\hat{V}_r \ \hat{V}_\perp] \in \mathbb{O}_n$  where  $\hat{V}_r \in \mathbb{O}_{n,r}$ ,  $\hat{V}_\perp \in \mathbb{O}_{n,n-r}$  correspond to the first  $r$  and last  $(n-r)$  right singular vectors of  $Y$  respectively. Let  $V = [V_r \ V_\perp] \in \mathbb{O}_{n,n}$  be any orthogonal matrix with  $V_r \in \mathbb{O}_{n,r}$ ,  $V_\perp \in \mathbb{O}_{n,n-r}$ . Given that  $\sigma_R(YV_r) > \sigma_{r+1}(Y)$ , we have*

$$\|\sin \Theta(V_r, \hat{V}_r)\| \leq \frac{\sigma_r(YV_r) \|\mathcal{P}_{YV_r} YV_\perp\|}{\sigma_r^2(YV_r) - \sigma_{r+1}^2(Y)} \wedge 1, \quad (56)$$

where  $\mathcal{P}_A$  is the projection operator onto the column space of  $A$ .

**Lemma 25** (Properties of the  $\sin \Theta$  distances ).

The following properties hold for the  $\sin \Theta$  distances.

1. (Equivalent Expressions) Suppose  $V, \hat{V} \in \mathbb{O}_{p,R}$ . If  $V_\perp$  is an orthogonal extension of  $V$ , namely  $[V \ V_\perp] \in \mathbb{O}_p$ , we have the following equivalent forms for  $\|\sin \Theta(\hat{V}, V)\|$  and  $\|\sin \Theta(\hat{V}, V)\|_F$ ,

$$\|\sin \Theta(\hat{V}, V)\| = \sqrt{1 - \sigma_{\min}^2(\hat{V}^T V)} = \|\hat{V}^T V_\perp\|,$$

$$\|\sin \Theta(\hat{V}, V)\|_F = \sqrt{r - \|V^T \hat{V}\|_F^2} = \|\hat{V}^T V_\perp\|_F.$$

2. (Triangle Inequality) For all  $V_1, V_2, V_3 \in \mathbb{O}_{p,R}$ ,

$$\|\sin \Theta(V_2, V_3)\| \leq \|\sin \Theta(V_1, V_2)\| + \|\sin \Theta(V_1, V_3)\|,$$

$$\|\sin \Theta(V_2, V_3)\|_F \leq \|\sin \Theta(V_1, V_2)\|_F + \|\sin \Theta(V_1, V_3)\|_F.$$

3. (Equivalence with Other Metrics)

$$\|\sin \Theta(\hat{V}, V)\| \leq \sqrt{2} \|\sin \Theta(\hat{V}, V)\|_F,$$

$$\|\sin \Theta(\hat{V}, V)\|_F \leq \sqrt{2} \|\sin \Theta(\hat{V}, V)\|,$$

$$\|\sin \Theta(\hat{V}, V)\| \leq \|\hat{V} \hat{V}^T - V V^T\| \leq 2 \|\sin \Theta(\hat{V}, V)\|,$$

$$\|\hat{V} \hat{V}^T - V V^T\|_F = \sqrt{2} \|\sin \Theta(\hat{V}, V)\|_F.$$

**Theorem 26** (Mirsky's singular value inequality in Mirsky (1960)). *For any matrices  $A, B \in \mathbb{R}^{m \times n}$ , let  $A = V_1 \Sigma(A) W_1^T$  and  $B = V_2 \Sigma(B) W_2^T$  be the full SVDs of  $A$  and  $B$ , respectively. Note that  $\Sigma(A), \Sigma(B) \in \mathbb{R}^{m \times n}$  are non-negative (rectangular) diagonal matrices whose diagonal entries are the non-increasingly ordered singular values of  $A$  and  $B$ , respectively. Then*

$$\|\Sigma(A) - \Sigma(B)\| \leq \|A - B\| \quad (57)$$

for any unitarily invariant norm  $\|\cdot\|$  on  $\mathbb{R}^{m \times n}$ .

**Theorem 27** (Weyl’s Inequality for Singular Values ). *Let  $A, B \in \mathbb{R}^{m \times n}$  and denote their singular values (in nonincreasing order) by  $\{\sigma_i(A)\}$  and  $\{\sigma_i(B)\}$  respectively. In addition denote the singular values of  $A + B$  as  $\{\sigma_i(A + B)\}$ . Then for all indices  $i, j$  satisfying  $i + j - 1 \leq \min\{m, n\}$ ,*

$$\sigma_{i+j-1}(A + B) \leq \sigma_i(A) + \sigma_j(B).$$

**Lemma 28** (Ky Fan-type Inequality for Sums of Matrices). *Let  $A, B \in \mathbb{R}^{m \times n}$  and denote their singular values (in nonincreasing order) by  $\{\sigma_i(A)\}$  and  $\{\sigma_i(B)\}$  respectively. In addition denote the singular values of  $A + B$  as  $\{\sigma_i(A + B)\}$ . Then for any  $1 \leq k \leq \min\{m, n\}$ , it holds that*

$$\sqrt{\sum_{i=1}^k \sigma_i^2(A + B)} \leq \sqrt{\sum_{i=1}^k \sigma_i^2(A)} + \sqrt{\sum_{i=1}^k \sigma_i^2(B)}.$$

*Proof.* For a symmetric matrix  $M \in \mathbb{R}^{n \times n}$ , by Ky Fan’s maximum principle (see e.g. II.1.13 in Bhatia (2013)), for any  $1 \leq k \leq n$ ,

$$\sum_{i=1}^k \lambda_i(M) = \sup_{P \in \mathbb{O}^{n \times k}} \text{tr}(P^\top M P).$$

Therefore

$$\sum_{i=1}^k \sigma_i^2(A) = \sum_{i=1}^k \lambda_i(A^\top A) = \sup_{P \in \mathbb{O}^{n \times k}} \text{tr}(P^\top A^\top A P) = \sup_{P \in \mathbb{O}^{n \times k}} \|AP\|_F^2,$$

and so

$$\sqrt{\sum_{i=1}^k \sigma_i^2(A)} = \sup_{P \in \mathbb{O}^{n \times k}} \|AP\|_F.$$

Then

$$\begin{aligned} \sqrt{\sum_{i=1}^k \sigma_i^2(A + B)} &= \max_{U \in \mathbb{O}_{n,k}} \|(A + B)U\|_F \leq \max_{U \in \mathbb{O}_{n,k}} \|AU\|_F + \max_{U \in \mathbb{O}_{n,k}} \|BU\|_F \\ &= \sqrt{\sum_{i=1}^k \sigma_i^2(A)} + \sqrt{\sum_{i=1}^k \sigma_i^2(B)}. \end{aligned}$$

□

Let  $\mathcal{T}_{(r_1, r_2, r_3)}$  denote the class of tensor in  $\mathbb{R}^{p_1 \times p_2 \times p_3}$  with Tucker ranks at most  $(r_1, r_2, r_3)$ . More precisely

$$\mathcal{T}_{(r_1, r_2, r_3)} = \{A \in \mathbb{R}^{p_1 \times p_2 \times p_3} : \text{rank}(\mathcal{M}_k(A)) \leq r_k, k = 1, 2, 3\}.$$

**Lemma 29.** *Let  $X^* \in \mathbb{R}^{p_1 \times p_2 \times p_3}$ . For  $k \in \{1, 2, 3\}$ , suppose the  $k$ -th matricization of  $X^*$  satisfies*

$$\mathcal{M}_k(X^*) = [U_k^* \quad U_{k\perp}^*] \begin{bmatrix} \Sigma_k^* & 0 \\ 0 & \Sigma_{k\perp}^* \end{bmatrix} [V_k^* \quad V_{k\perp}^*]^\top$$

where  $U_k^* \in \mathbb{O}_{p_k, r_k}$  corresponds to the the top  $r_k$  singular vectors of  $\mathcal{M}_k(X^*)$ . Then for  $k \in \{1, 2, 3\}$ , it holds that

$$\|X^* \times_k U_{k\perp}^*\|_F = \|X^* \times_k (I_{p_k} - \mathcal{P}_{U_k^*})\|_F = \sqrt{\sum_{j=r_k+1}^{\text{rank}(\mathcal{M}_k(X^*))} \sigma_j^2(\mathcal{M}_k(X^*))} \leq \xi_{(r_1, r_2, r_3)},$$

where

$$\xi_{(r_1, r_2, r_3)} = \inf_{A \in \mathcal{T}_{(r_1, r_2, r_3)}} \|A - X^*\|_F.$$

1944 *Proof.* By symmetry, it suffices to consider  $k = 1$ . Note that

$$1945 \quad \|X^* \times_k (I_{p_k} - \mathcal{P}_{U_k^*})\|_F = \|X^* \times_k \mathcal{P}_{U_{k\perp}^*}\|_F = \|X^* \times_k U_{k\perp}^*\|_F.$$

1947 In addition

$$1948 \quad \begin{aligned} 1949 \quad \|X^* \times_1 (I_{p_1} - \mathcal{P}_{U_1^*})\|_F &= \|(I_{p_1} - \mathcal{P}_{U_1^*}) \cdot \mathcal{M}_1(X^*)\|_F = \|U_{1\perp}^* U_{1\perp}^{*\top} \cdot (U_1^* \Sigma_1^* V_1^{*\top} + U_{1\perp}^* \Sigma_{1\perp}^* V_{1\perp}^{*\top})\|_F \\ 1950 \quad &= \|U_{1\perp}^* U_{1\perp}^{*\top} \cdot (U_{1\perp}^* \Sigma_{1\perp}^* V_{1\perp}^{*\top})\|_F = \sqrt{\sum_{j=r_1+1}^{\text{rank}(\mathcal{M}_1(X^*))} \sigma_j^2(\mathcal{M}_1(X^*))}. \end{aligned}$$

1954 Note that by the properties of SVD, for any  $W \in \mathbb{R}^{p_1 \times p_2 p_3}$  such that  $\text{rank}(W) \leq r_1$ , it holds that

$$1955 \quad \sqrt{\sum_{j=r_1+1}^{\text{rank}(\mathcal{M}_1(X^*))} \sigma_j^2(\mathcal{M}_1(X^*))} \leq \|\mathcal{M}_1(X^*) - W\|_F.$$

1959 For any  $A \in \mathcal{T}_{(r_1, r_2, r_3)}$ , it holds that  $\text{rank}(\mathcal{M}_1(A)) \leq r_1$ . Therefore for any  $A \in \mathcal{T}_{(r_1, r_2, r_3)}$ ,

$$1960 \quad \sqrt{\sum_{j=r_1+1}^{\text{rank}(\mathcal{M}_1(X^*))} \sigma_j^2(\mathcal{M}_1(X^*))} \leq \|\mathcal{M}_1(X^*) - A\|_F.$$

1964 Taking the inf over all  $A \in \mathcal{T}_{(r_1, r_2, r_3)}$ , it follows that

$$1965 \quad \sqrt{\sum_{j=r_1+1}^{\text{rank}(\mathcal{M}_1(X^*))} \sigma_j^2(\mathcal{M}_1(X^*))} \leq \xi_{(r_1, r_2, r_3)}.$$

1970 □

1971  
1972  
1973  
1974  
1975  
1976  
1977  
1978  
1979  
1980  
1981  
1982  
1983  
1984  
1985  
1986  
1987  
1988  
1989  
1990  
1991  
1992  
1993  
1994  
1995  
1996  
1997
